# Supplementary material for: 2-Nitroallyl carbonate-based green bifunctional reagents for catalytic asymmetric annulation reactions
Source: Royal Society of Chemistry journal article supplement (doi:10.1039/d0ob02283g), 2021-01-01
Supplement: d0ob02283g1.pdf [file d0ob02283g1.pdf]

## SUPPORTING INFORMATION

### **2-Nitroallyl carbonate–based green bifunctional reagents for catalytic asymmetric annulation reactions**

*Alexey A. Kostenko, Kseniya A. Bykova, Alexander S. Kucherenko\*, Andrey N. Komogortsev, Boris V. Lichitsky and Sergei G. Zlotin\**

*N.D. Zelinsky Institute of Organic Chemistry, Russian Academy of Sciences, 47 Leninsky Prospect, 119991, Moscow, Russian Federation*

*e-mail: zlotin@ioc.ac.ru, alexkucherenko@yandex.ru*

## Contents

|                                                                               |     |
|-------------------------------------------------------------------------------|-----|
| <b>1. General information</b>                                                 | S3  |
| <b>2. Synthesis of nitroallylic carbonates 2a-e.</b>                          | S4  |
| <b>3. Catalytic asymmetric [3 + 3] annulation of 2 with 3.</b>                | S6  |
| <b>4. NMR pictures for compounds 2 and 8.</b>                                 | S9  |
| <b>5. HPLC data for Michael adducts 8.</b>                                    | S28 |
| <b>6. X-ray crystallographic data and refinement details for product 8ag.</b> | S34 |

## 1. General information.

HRMS (high-resolution mass spectrometry) spectra were measured using electrospray ionization (ESI) and a time-of-flight (TOF) mass analyzer. The measurements were taken in the positive ion mode (interface capillary voltage 4500 V) in the mass range from  $m/z = 50$  Da to  $m/z = 3000$  Da; external or internal calibration was done with an electrospray calibrant solution. NMR spectra were recorded on a 300 MHz spectrometer. The chemical shifts of  $^1\text{H}$ ,  $^{13}\text{C}$  were measured relative to  $\text{Me}_4\text{Si}$ ,  $\text{CDCl}_3$  respectively. HPLC analyses were performed on an HPLC system equipped with chiral stationary phase columns (*AD-H*, *OD-H*, *OJ-H*, *IB-H*), detection at 220 or 254 nm. Optical rotations were measured on a Jasco P-2000 digital polarimeter with a sodium lamp and reported as follows;  $[\alpha]^{T^\circ}_D$  ( $c = \text{g}/100 \text{ mL}$ , solvent). Silica gel (0.060–0.200 mm) was used for column chromatography. All reagents and solvents were purified and dried according to common methods.

## 2. Synthesis of nitroallylic carbonates 2a-e.

### 2a. Optimization of the reaction conditions.

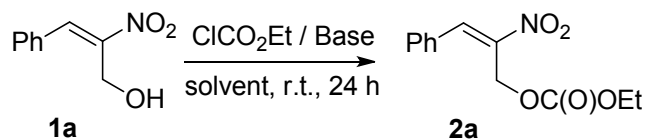

| Entry <sup>a</sup> | Solvent | Base              | Yield, %           |
|--------------------|---------|-------------------|--------------------|
| 1                  | THF     | Et <sub>3</sub> N | < 20% <sup>b</sup> |
| 2                  | DCM     | Et <sub>3</sub> N | < 20% <sup>b</sup> |
| 3                  | THF     | DABCO             | 25                 |
| 4                  | DCM     | DABCO             | 35                 |
| 5                  | THF     | DMAP              | 60                 |
| 6                  | DCM     | DMAP              | 93                 |
| 7                  | THF     | DBU               | 40                 |
| 8                  | DCM     | DBU               | 37                 |

<sup>a</sup>All reactions were carried out **1a** (100 mg, 0.56 mmol), base (0.61 mmol, 1.1 equiv.) and ethyl chloroformate (66.8 mg, 0.61 mmol, 1.1 equiv) in the corresponding solvent (0.5 mL) at r.t. <sup>b</sup><sup>1</sup>H NMR data.

### 2b. Preparation of nitroallylic carbonates 2a-e. General procedure and characterization data.

**General procedure.** To solution of nitroallylic alcohol **1a-e**<sup>1-3</sup> (6.8 mmol) in DCM (4.0 mL) were added DMAP (1.22 g, 10.0 mmol) and ethyl chloroformate (0.7 mL, 10.0 mmol) at 0° C. After the reaction was completed (TLC), the mixture was diluted with CH<sub>2</sub>Cl<sub>2</sub> (10 mL) and washed with H<sub>2</sub>O (3 x 5 mL). The organic phases were dried over Na<sub>2</sub>SO<sub>4</sub>, filtered and evaporated (10 Torr). Yellow residue was purified by flash chromatography (*n*-hexane/EtOAc 5/1 - 2/1) to afford pure products **2a-e**. Characterization data for **2a-e** are given below:

**Ethyl (2-nitro-3-phenylallyl) carbonate (2a)** Yellow solid (1.46 g, 85%). M.p. 66-68 °C. <sup>1</sup>H NMR (300 MHz, CDCl<sub>3</sub>): δ 8.40 (s, 1H), 7.52 (s, 5H), 5.30 (s, 2H), 4.29 (q, *J* = 7.1, 14.3 Hz, 2H), 1.37 (t, *J* = 7.1 Hz, 3H). <sup>13</sup>C{<sup>1</sup>H} NMR (75 MHz, CDCl<sub>3</sub>): 154.5, 144.7, 140.6, 131.4, 130.8, 130.1, 129.3, 64.8, 60.6, 14.2 ppm. HRMS (ESI): *m/z* calcd. for C<sub>12</sub>H<sub>14</sub>NO<sub>5</sub><sup>+</sup> [M+H]<sup>+</sup>: 252.0866, found 252.0859.

**3-(4-Bromophenyl)-2-nitroallyl ethyl carbonate (2b)**. Yellow solid (2.06 g, 92%). M.p. = 68-71 °C. <sup>1</sup>H NMR (300 MHz, CDCl<sub>3</sub>) δ 8.31 (s, 1H), 7.67-7.64 (d, *J* = 8.4 Hz, 2H), 7.40-7.38 (d, *J*

= 8.4 Hz, 2H), 5.26 (s, 2H), 4.32-4.25 (q,  $J = 7.1, 14.3$  Hz, 2H), 1.39-1.34 (t,  $J = 7.1$  Hz, 3H) ppm.  $^{13}\text{C}\{^1\text{H}\}$  NMR (75 MHz,  $\text{CDCl}_3$ )  $\delta$  154.6, 145.0, 139.3, 132.7, 131.5, 129.7, 126.3, 64.4, 60.4, 14.2 ppm. HRMS (ESI):  $m/z$  calcd. for  $\text{C}_{12}\text{H}_{13}\text{BrNO}_5^+$   $[\text{M}+\text{H}]^+$ : 329.9972, found 329.9981.

**3-(4-Fluorophenyl)-2-nitroallyl ethyl carbonate (2c).** Yellow solid (1.70 g, 93%), M.p. 55-56°C.  $^1\text{H}$  NMR (300 MHz,  $\text{CDCl}_3$ )  $\delta$  8.36 (s, 1H), 7.55 (m, 2H), 7.21 (t,  $J = 5.1$  Hz, 2H), 5.28 (s, 2H), 4.33-4.26 (q,  $J = 7.1, 14.3$  Hz, 2H), 1.43-1.32 (t,  $J = 7.1$  Hz, 3H) ppm.  $^{13}\text{C}\{^1\text{H}\}$  NMR (75 MHz,  $\text{CDCl}_3$ )  $\delta$  166.1, 162.8, 154.4, 144.5, 139.4, 132.5, 132.4, 127.0, 127.0, 116.8, 116.5, 64.9, 60.5, 14.2 ppm. HRMS (ESI):  $m/z$  calcd. for  $\text{C}_{12}\text{H}_{13}\text{FNO}_5^+$   $[\text{M}+\text{H}]^+$ : 270.0772, found 270.0779

**Ethyl (2-nitro-3-(thiophen-2-yl)allyl) carbonate (2d).** Yellow solid (1.57 g, 90%). M.p. 66-69°C.  $^1\text{H}$  NMR (300 MHz,  $\text{CDCl}_3$ )  $\delta$  8.49 (s, 1H), 7.76-7.74 (d,  $J = 5.3$  Hz, 1H), 7.57-7.56 (d,  $J = 3.6$  Hz, 1H), 7.21 (m, 1H), 5.47 (s, 2H), 4.29-4.22 (q,  $J = 7.2, 14.3$  Hz, 2H), 1.32 (t,  $J = 7.1$ , 3H) ppm.  $^{13}\text{C}\{^1\text{H}\}$  NMR (75 MHz,  $\text{CDCl}_3$ )  $\delta$  154.6, 141.0, 137.0, 134.4, 133.2, 128.8, 64.7, 60.6, 14.2 ppm. HRMS (ESI):  $m/z$  calcd. for  $\text{C}_{10}\text{H}_{12}\text{NO}_5\text{S}^+$   $[\text{M}+\text{H}]^+$ : 258.0431, found 258.0442.

**Ethyl (2-nitro-5-phenylpenta-2,4-dien-1-yl) carbonate (2e).** Yellow solid (1.66 g, 88%). M.p. 75-77°C.  $^1\text{H}$  NMR (300 MHz,  $\text{CDCl}_3$ )  $\delta$  8.04-8.01 (d,  $J = 10.0$  Hz, 1H), 7.59 (m, 2H), 7.43 (m, 3H), 7.28-7.14 (m, 2H), 5.36 (s, 2H), 4.29-4.22 (q,  $J = 7.1$  Hz, 2H), 1.33 (t,  $J = 7.1$  Hz, 3H) ppm.  $^{13}\text{C}\{^1\text{H}\}$  NMR (75 MHz,  $\text{CDCl}_3$ )  $\delta$  154.8, 147.8, 143.1, 139.9, 135.1, 130.6, 129.0, 128.1, 120.1, 64.6, 59.3, 14.1 ppm. HRMS (ESI):  $m/z$  calcd. for  $\text{C}_{14}\text{H}_{16}\text{NO}_5^+$   $[\text{M}+\text{H}]^+$ : 278.1023, found 278.1028.

### References for sections 1 and 2

- 1 J. An, L. Q. Lu, Q. Q. Yang, T. Wang and W. J. Xiao, Enantioselective construction of oxa- and aza-angular triquinanes through tandem  $[4 + 1]/[3 + 2]$  cycloaddition of sulfur ylides and nitroolefins, *Org. Lett.*, 2013, **15**, 542–545.
- 2 R. Parella, S. Jakkampudi, H. Arman and J. C. G. Zhao, Stereoselective Synthesis of 3-Oxabicyclo[3.3.1]Nonan-2-Ones via a Domino Reaction Catalyzed by Modularly Designed Organocatalysts, *Adv. Synth. Catal.*, 2019, **361**, 208–213.
- 3 N. Rastogi, I. N. N. Namboothiri and M. Cojocar,  $\alpha$ -Hydroxymethylation of conjugated nitroalkenes via the Morita-Baylis-Hillman reaction, *Tetrahedron Lett.*, 2004, **45**, 4745–4748.

### 3. Catalytic asymmetric [3 + 3] annulation of 2 with 3.

**Model reaction between 2a and 3a.** A mixture of organocatalyst **4** – **7** (0.0025 mmol, 5 mol %), **2a** (12.6 mg, 0.05 mmol) and dimedone **3a** (7.0 mg, 0.05 mmol) in DCM (0.1 mL) was stirred at ambient temperature for 5 h. The mixture was concentrated under reduced pressure (10 Torr), the residue was purified by flash chromatography (ethyl acetate) to afford **8aa** as yellow oil.

**General procedure.** A mixture of organocatalyst **4b** (1.22 mg, 0.0025 mmol, 5 mol %), carbonate **2** (0.05 mmol) and cyclic enol **3** (0.05 mmol) in DCM (0.1 mL) was stirred at ambient temperature for 3-5 h. The mixture was concentrated under reduced pressure (10 Torr) and the residue was purified by flash chromatography on silicagel (ethyl acetate) to afford product **8**. Characterization data for **8** are given below:

**7,7-Dimethyl-3-nitro-4-phenyl-3,4,7,8-tetrahydro-2H-chromen-5(6H)-one (8aa)** Yellow oil (14.4 mg, 96%). 94% *ee*,  $[\alpha]_{\text{D}}^{20}$ : +43.1 (c 0.1, CHCl<sub>3</sub>). <sup>1</sup>H NMR (300 MHz, DMSO-d<sub>6</sub>) δ 7.32 (m, 5H), 5.18 (d, *J* = 1.5 Hz, 1H), 4.77 (dt, *J* = 13.3 Hz, 1H), 4.63 (br s, 1H), 4.03 (dd, *J* = 11.9 Hz, 1., 1H), 2.62 (d, *J* = 17.2 Hz, 1H), 2.31 (t, *J* = 21.2 Hz, 2H), 2.12 (d, *J* = 15.8 Hz, 1H), 1.09 (s, 3H), 0.96 (s, 3H) ppm. <sup>13</sup>C{<sup>1</sup>H} NMR (75 MHz, DMSO-d<sub>6</sub>) δ 196.0, 169.8, 140.9, 129.1, 128.6, 127.6, 108.3, 82.7, 63.4, 50.5, 41.6, 36.3, 32.6, 29.3, 26.9 ppm. HRMS (ESI): *m/z* calcd. for C<sub>17</sub>H<sub>20</sub>NO<sub>4</sub> [M+H]<sup>+</sup>: 302.1387, found 302. 1380.

**3-Nitro-4-phenyl-3,4,6,7-tetrahydrocyclopenta[b]pyran-5(2H)-one (8ab)** Yellow oil (12.4 mg, 96%). 65% *ee*,  $[\alpha]_{\text{D}}^{20}$ : +56.2 (c 0.1, CHCl<sub>3</sub>). <sup>1</sup>H NMR (300 MHz, DMSO-d<sub>6</sub>) δ 7.35 (m, 5H), 5.23 (d, *J* = 1.7 Hz, 1H), 4.95 (dt, *J* = 13.4 Hz, 1H), 4.48 (br s, 1H), 4.20 (dd, *J* = 13.3 Hz, 1.8 Hz, 1H), 2.70 (m, 2H), 2.41 (m, 2H) ppm. <sup>13</sup>C{<sup>1</sup>H} NMR (75 MHz, DMSO-d<sub>6</sub>) δ 202.1, 184.0, 139.3, 129.2, 128.8, 127.9, 112.8, 82.8, 65.5, 36.8, 33.6, 26.3 ppm. HRMS (ESI): *m/z* calcd. for C<sub>14</sub>H<sub>13</sub>NO<sub>4</sub> [M+H]<sup>+</sup>: 260.0917, found 260.0922.

**7-Methyl-3-nitro-4-phenyl-3,4-dihydropyrano[4,3-b]pyran-5(2H)-one (8ac)** Yellow oil (13.5 mg, 94%). 87% *ee*,  $[\alpha]_{\text{D}}^{20}$ : +71.7 (c 0.1, CHCl<sub>3</sub>). <sup>1</sup>H NMR (300 MHz, CDCl<sub>3</sub>) δ 7.39-7.17 (m, 5H), 5.91 (s, 1H), 4.91-4.77 (m, 3H), 4.23 (d, *J* = 12.8 Hz, 1H), 2.27 (s, 3H) ppm. <sup>13</sup>C{<sup>1</sup>H} NMR (75 MHz, DMSO-d<sub>6</sub>) δ 164.7, 162.5, 139.8, 129.3, 128.7, 128.0, 99.6, 96.4, 82.4, 63.4, 37.5, 19.7 ppm. HRMS (ESI): *m/z* calcd. for C<sub>15</sub>H<sub>14</sub>NO<sub>5</sub><sup>+</sup> [M+H]<sup>+</sup>: 288.0866, found 288.0857.

**3-Nitro-4-phenyl-3,4-dihydropyrano[3,2-c]chromen-5(2H)-one (8ad)** White solid (14.9 mg, 92%), M.p. 58–60 °C. 70% *ee*,  $[\alpha]_{\text{D}}^{20}$ : +98.4 (c 0.1, CHCl<sub>3</sub>). <sup>1</sup>H NMR (300 MHz, DMSO-d<sub>6</sub>) δ 7.85 (d, *J* = 7.8 Hz, 1H), 7.71 (t, *J* = 7.7 Hz, 1H), 7.48 – 7.31 (m, 7H), 5.42 (d, *J* = 1.2 Hz, 1H), 5.10 (dt, *J* = 13.3 Hz, 1H), 4.83 (br s, 1H), 4.37 (dd, *J* = 12.8 Hz, 1.5 Hz, 1H) ppm. <sup>13</sup>C{<sup>1</sup>H}

**NMR** (75 MHz, DMSO- $d_6$ )  $\delta$  161.0, 159.8, 152.5, 139.7, 133.2, 129.3, 128.9, 128.0, 125.0, 123.1, 117.0, 114.6, 99.8, 82.4, 64.1, 28.0 ppm. HRMS (ESI):  $m/z$  calcd. for  $C_{18}H_{14}NO_5^+$   $[M+H]^+$ : 324.0866, found 324.0862.

**1,3-Diethyl-6-nitro-5-phenyl-2-thioxo-2,3,6,7-tetrahydro-1H-pyrano[2,3-d]pyrimidin-4(5H)-one (8ae)**. Yellow oil (15.7 mg, 87%). 91% *ee*,  $[\alpha]_D^{20}$ : +78.0 (c 0.1,  $CHCl_3$ ).  **$^1H$  NMR** (300 MHz,  $CDCl_3$ )  $\delta$  7.43-7.24 (m, 5H), 5.08-5.04 (m, 1H), 4.96 (s, 1H), 4.78-4.43 (m, 5H), 4.38-4.33 (m, 1H), 1.36 (t,  $J = 7.0$  Hz, 3H), 1.27 (t,  $J = 7.0$  Hz, 3H) ppm.  **$^{13}C\{^1H\}$  NMR** (76 MHz,  $CDCl_3$ )  $\delta$  175.5, 159.4, 155.3, 138.9, 129.5, 129.0, 128.6, 128.3, 127.6, 89.7, 81.8, 64.1, 44.3, 43.7, 38.6, 12.7, 11.5 ppm. HRMS (ESI):  $m/z$  calcd. for  $C_{25}H_{20}N_3O_4S^+$   $[M+H]^+$ : 362.1130, found 362.1123.

**6-Nitro-1,3,5-triphenyl-2-thioxo-2,3,6,7-tetrahydro-1H-pyrano[2,3-d]pyrimidin-4(5H)-one (8af)** White solid (18.3 mg, 80%). 91% *ee*,  $[\alpha]_D^{20}$ : +201.0 (c 0.1, DMSO). M.p. 57–59 °C. Very poor soluble compound in common solvents.  **$^1H$  NMR** (300 MHz, DMSO- $d_6$ )  $\delta$  7.62-7.12 (m, 15H), 5.28 (s, 1H), 4.88-4.82 (m, 2H), 4.22 (m, 1H) ppm.  **$^{13}C\{^1H\}$  NMR** (75 MHz, DMSO- $d_6$ )  $\delta$  178.0, 160.4, 156.6, 140.5, 140.0, 138.6, 129.8, 129.6, 129.5, 129.3, 129.2, 128.8, 128.4, 128.0, 90.5, 82.0, 65.2, 38.0 ppm. HRMS (ESI):  $m/z$  calcd. for  $C_{25}H_{20}N_3O_4S^+$   $[M+H]^+$ : 458.1130, found 458.1169.

**3-Nitro-4-phenyl-3,4-dihydro-2H-benzo[g]chromene-5,10-dione (8ag)** White solid (15.8 mg, 95%). 99% *ee*,  $[\alpha]_D^{20}$ : +102.6 (c 0.1, DMSO). M.p. >230 °C.  **$^1H$  NMR** (300 MHz, DMSO- $d_6$ )  $\delta$  8.06 (m, 1H), 7.88 (m, 3H), 7.40 (m, 6H), 5.35 (d,  $J = 1.6$  Hz, 1H), 5.00 (m, 2H), 4.22 (dt,  $J = 14.2$  Hz, 1H) ppm.  **$^{13}C\{^1H\}$  NMR** (75 MHz, DMSO- $d_6$ )  $\delta$  182.9, 178.4, 155.3, 140.1, 135.0, 134.3, 131.7, 131.2, 129.3, 129.0, 128.0, 126.5, 126.3, 118.8, 82.1, 63.7, 37.2 ppm. HRMS (ESI):  $m/z$  calcd. for  $C_{19}H_{14}NO_5^+$   $[M+H]^+$ : 336.0866, found 336.0861.

**2-Nitro-1-phenyl-2,3-dihydro-1H-benzo[a]pyrano[2,3-c]phenazine (8ah)**. Red solid (17.2 mg, 84%). 90% *ee*,  $[\alpha]_D^{20}$ : +92.5 (c 0.1, DMSO). M.p. >230 °C.  **$^1H$  NMR** (300 MHz, DMSO- $d_6$ )  $\delta$  8.91-8.89 (m, 1H), 8.18-8.08 (m, 2H), 7.92-7.75 (m, 4H), 7.58-7.53 (m, 1H), 7.40-7.25 (m, 5H), 5.75 (s, 1H), 5.35-5.26 (m, 2H), 4.03-3.96 (m, 1H) ppm.  **$^{13}C\{^1H\}$  NMR** (75 MHz, DMSO- $d_6$ )  $\delta$  177.9, 145.3, 140.9, 135.3, 134.6, 132.58, 132.3, 132.0, 131.6, 131.6, 131.5, 130.8, 129.4, 128.6, 127.9, 125.3, 125.1, 114.5, 103.4, 80.7, 42.7 ppm. HRMS (ESI):  $m/z$  calcd. for  $C_{25}H_{18}N_3O_3^+$   $[M+H]^+$ : 408.1343, found 408.1333.

**4-(4-Bromophenyl)-3-nitro-3,4-dihydro-2H-benzo[g]chromene-5,10-dione (8bg)** White solid (15.5 mg, 75%). M.p. >230 °C (dec.) 97% *ee*,  $[\alpha]_D^{20}$ : +105.1 (c 0.1,  $CHCl_3$ ).  **$^1H$  NMR** (300 MHz,  $CDCl_3$ )  $\delta$  8.20-8.17 (m, 1H), 8.05-8.02 (m, 1H), 7.78-7.75 (m, 2H), 7.54-7.52 (d,  $J = 8.4$

Hz, 2H), 7.20-7.17 (d,  $J = 8.4$  Hz, 2H), 5.13-5.08 (m, 2H), 4.80 (s, 1H), 4.36- 4.31 (m, 1H) ppm.  $^{13}\text{C}\{^1\text{H}\}$  NMR (75 MHz,  $\text{CDCl}_3$ )  $\delta$  182.4, 178.3, 154.4, 137.9, 134.7, 133.8, 132.7, 131.6, 130.8, 129.6, 126.8, 126.6, 122.6, 118.3, 81.6, 63.1, 37.1 ppm. HRMS (ESI):  $m/z$  calcd. for  $\text{C}_{19}\text{H}_{13}\text{BrNO}_5^+$   $[\text{M}+\text{H}]^+$ : 413.9932, found 413.9955.

**1-(4-Fluorophenyl)-2-nitro-2,3-dihydro-1H-benzo[a]pyrano[2,3-c]phenazine (8ch).** Red solid (18.5 mg, 87%). 94% *ee*,  $[\alpha]_{\text{D}}^{20}$ : +101.0 (c 0.1, DMSO). M.p. >220 °C.  $^1\text{H}$  NMR (300 MHz,  $\text{DMSO-d}_6$ )  $\delta$  8.91-8.89 (d,  $J = 7.6$  Hz, 1H), 8.19-8.08 (dd,  $J = 25.4, 7.6$  Hz, 1H), 7.91-7.14 (m, 9H), 5.74 (s, 1H), 5.35-5.27 (m, 2H), 4.04-4.00 (d,  $J = 16.6$  Hz, 1H) ppm.  $^{13}\text{C}\{^1\text{H}\}$  NMR (75 MHz,  $\text{DMSO-d}_6$ )  $\delta$  177.9, 145.4, 137.4, 135.4, 134.6, 132.5, 132.3, 132.0, 131.7, 131.6, 131.5, 130.9, 130.7, 125.3, 125.1, 116.2, 115.9, 114.4, 103.5, 80.6, 42.6, 38.5 ppm. HRMS (ESI):  $m/z$  calcd. for  $\text{C}_{25}\text{H}_{17}\text{FN}_3\text{O}_3^+$   $[\text{M}+\text{H}]^+$ : 426.1248, found 426.1241.

**3-Nitro-4-(thiophen-2-yl)-3,4-dihydro-2H-benzo[g]chromene-5,10-dione (8dg).** White solid (15.7 mg, 91%). M.p. 177-180 °C. 92% *ee*,  $[\alpha]_{\text{D}}^{20}$ : +79.8 (c 0.1, DMSO).  $^1\text{H}$  NMR (300 MHz,  $\text{DMSO-d}_6$ )  $\delta$  8.05 (m, 1H), 7.94 (m, 1H), 7.86 (m, 1H), 7.51 (m, 1H), 7.17 (m, 1H), 6.99 (m, 1H), 5.44 (s, 1H), 5.08 (m, 1H), 5.00 (m, 2H), 4.22 (m, 1H) ppm.  $^{13}\text{C}\{^1\text{H}\}$  NMR (75 MHz,  $\text{DMSO-d}_6$ )  $\delta$  182.7, 178.4, 154.4, 142.4, 135.1, 134.4, 131.6, 131.1, 128.1, 127.8, 126.8, 126.6, 126.4, 119.3, 81.5, 64.2, 32.2 ppm. HRMS (ESI):  $m/z$  calcd. for  $\text{C}_{17}\text{H}_{12}\text{NO}_5\text{S}^+$   $[\text{M}+\text{H}]^+$ : 342.0431, found 342.0452.

**3-Nitro-4-styryl-3,4-dihydro-2H-benzo[g]chromene-5,10-dione. (8eg)** White solid (16.2 mg, 90%). 99% *ee*,  $[\alpha]_{\text{D}}^{20}$ : +113.6 (c 0.1, DMSO). M.p. >230 °C (dec.)  $^1\text{H}$  NMR (300 MHz,  $\text{DMSO-d}_6$ )  $\delta$  8.05-7.86 (m, 5H), 7.44-7.24 (m, 6H), 6.71-6.45 (m, 2H), 5.46 (s, 1H), 5.12-5.07 (m, 1H), 4.54-4.50 (m, 2H) ppm.  $^{13}\text{C}\{^1\text{H}\}$  NMR (75 MHz,  $\text{DMSO-d}_6$ )  $\delta$  182.9, 178.5, 154.6, 136.7, 135.0, 134.4, 134.3, 131.8, 131.1, 129.0, 128.3, 127.8, 126.9, 126.4, 126.4, 118.9, 79.5, 64.1, 34.7 ppm. HRMS (ESI):  $m/z$  calcd. for  $\text{C}_{21}\text{H}_{16}\text{NO}_5^+$   $[\text{M}+\text{H}]^+$ : 362.1018, found 362.1028.



## 5. NMR pictures for compounds 2 and 8.

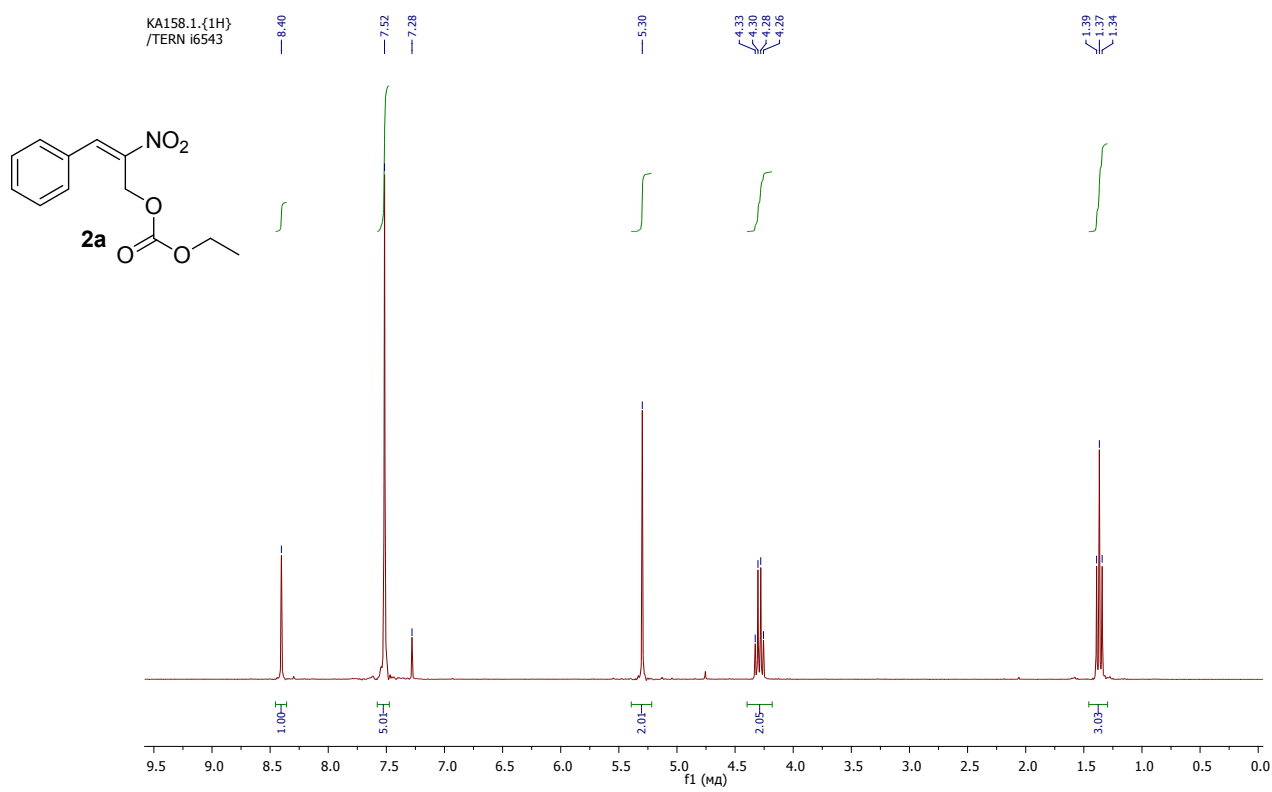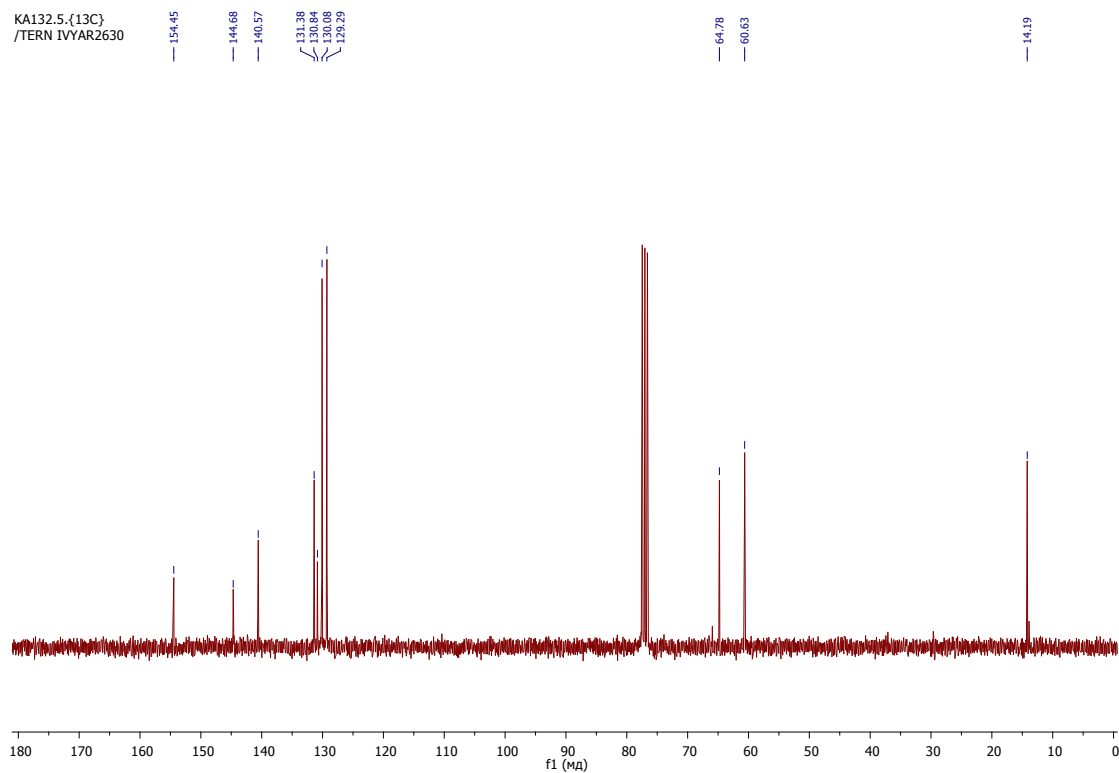

KB126.{1H}  
/ZSGN KB126

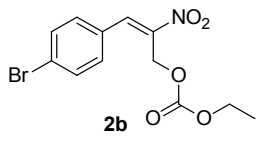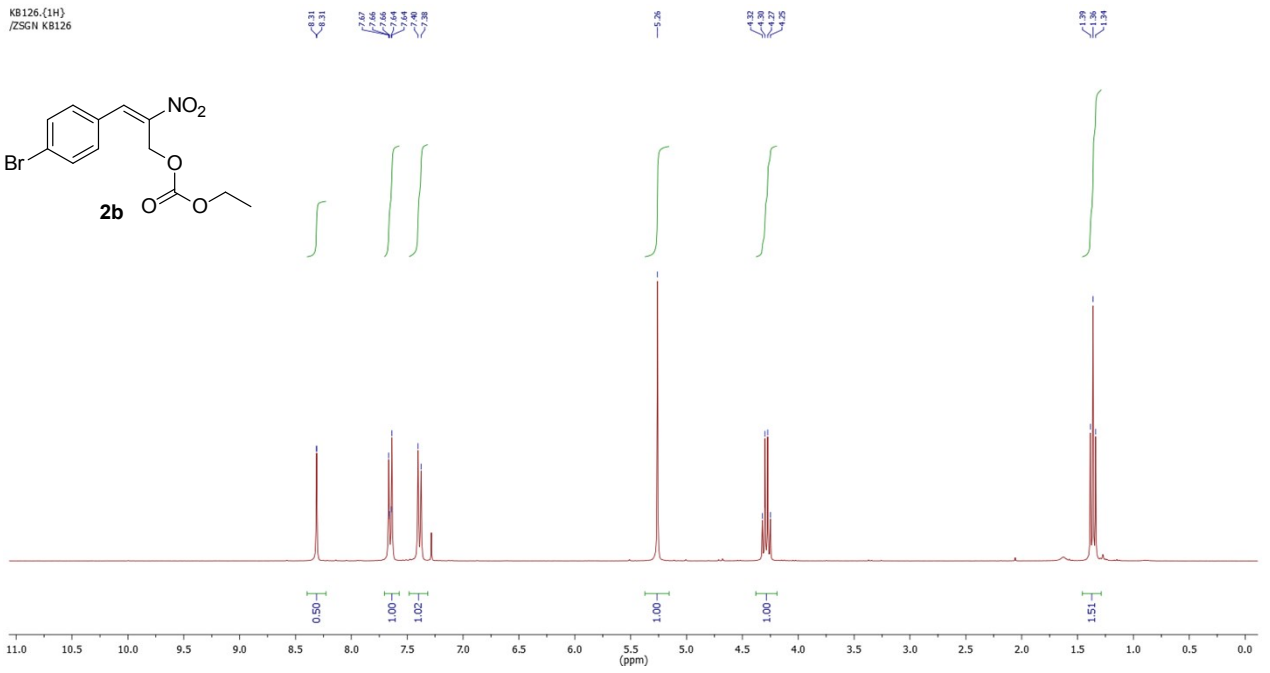

KB126.{13C}  
/ZSGN KB126

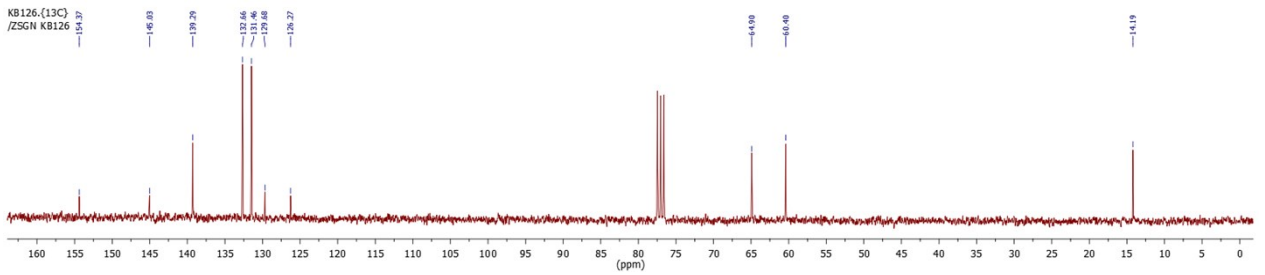

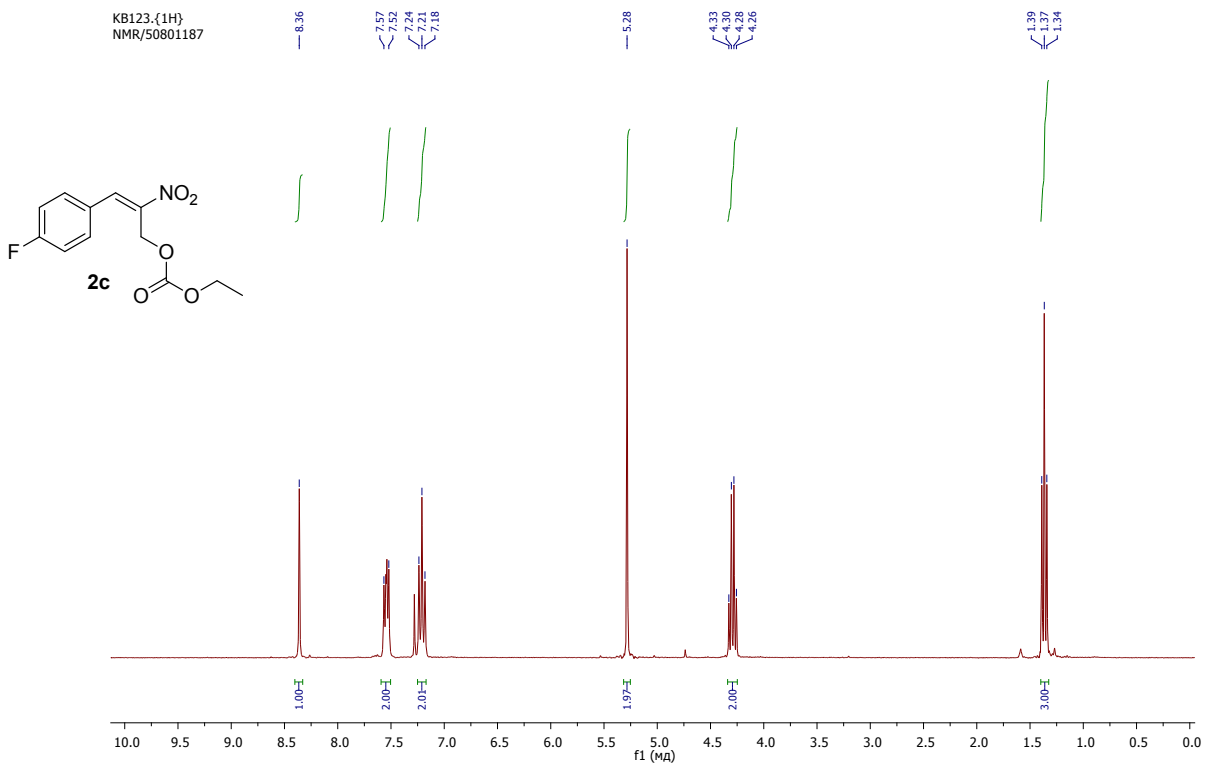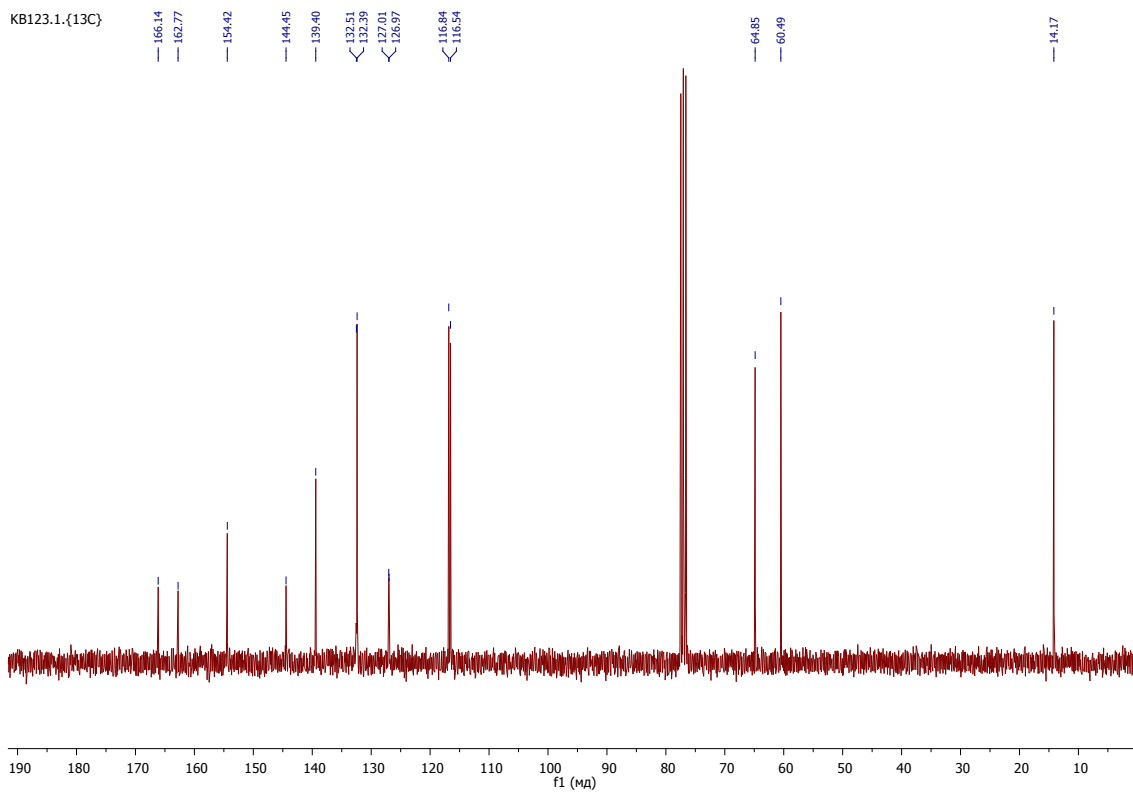

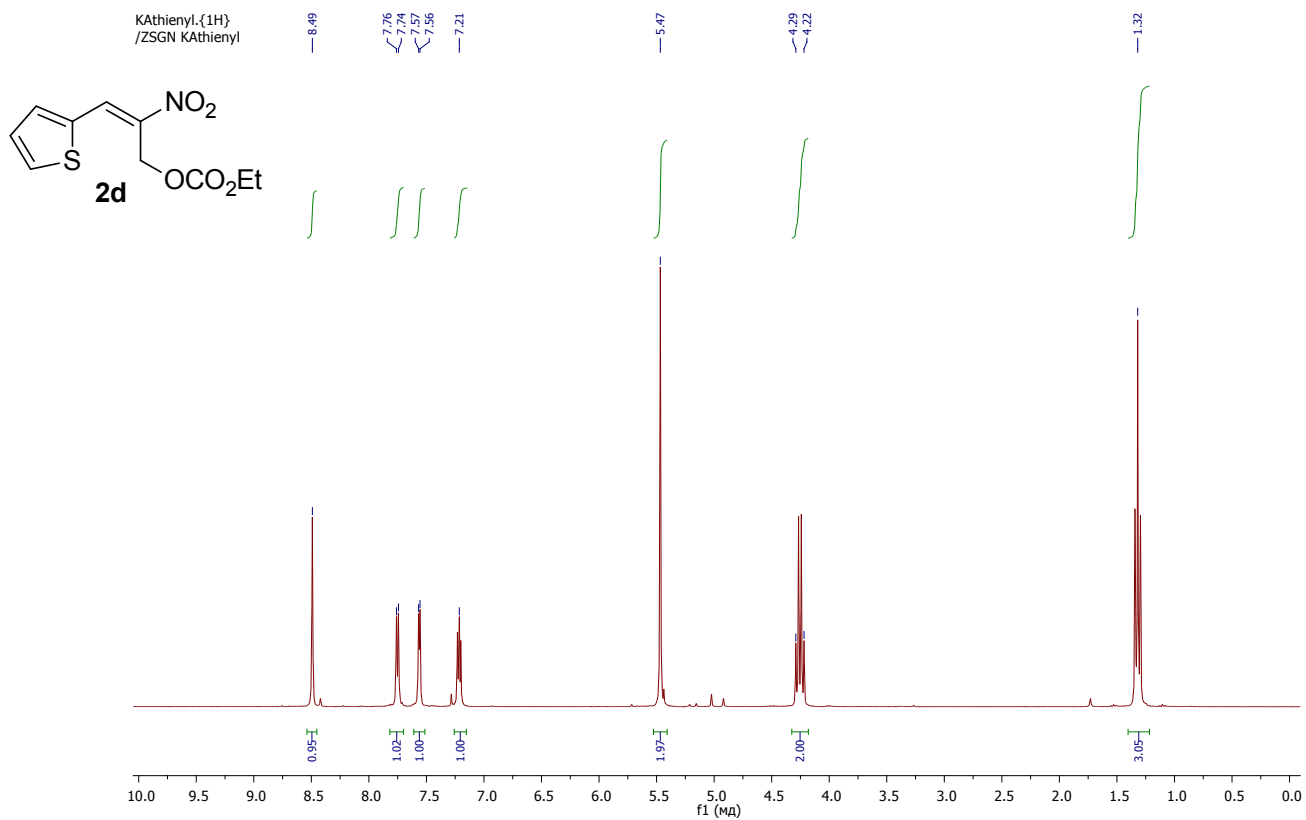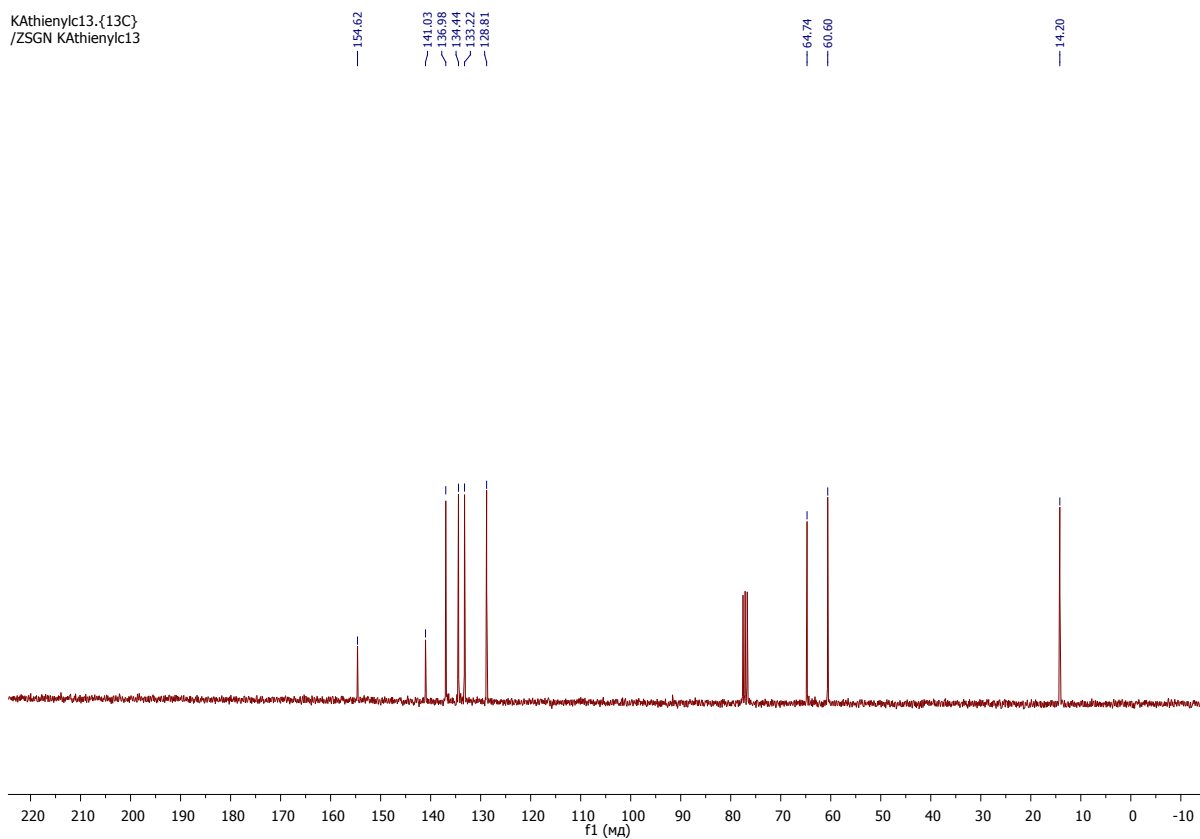

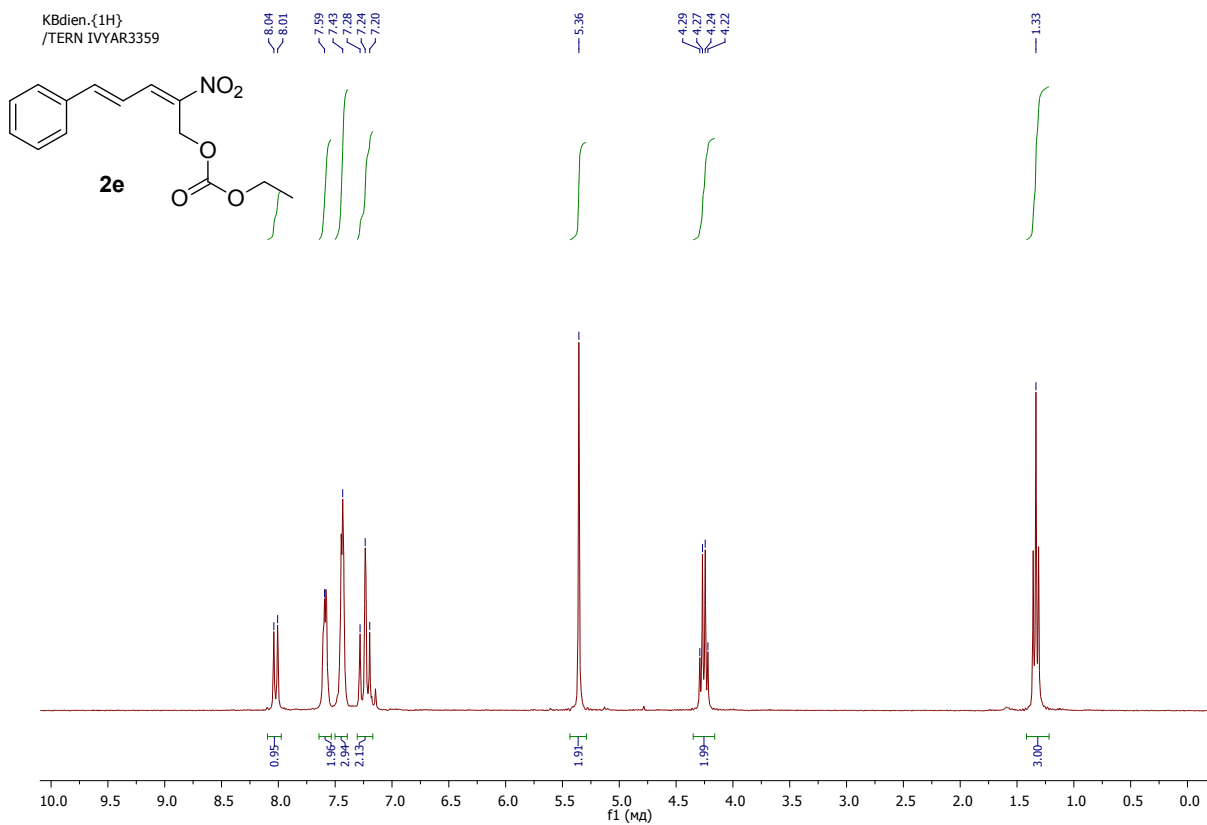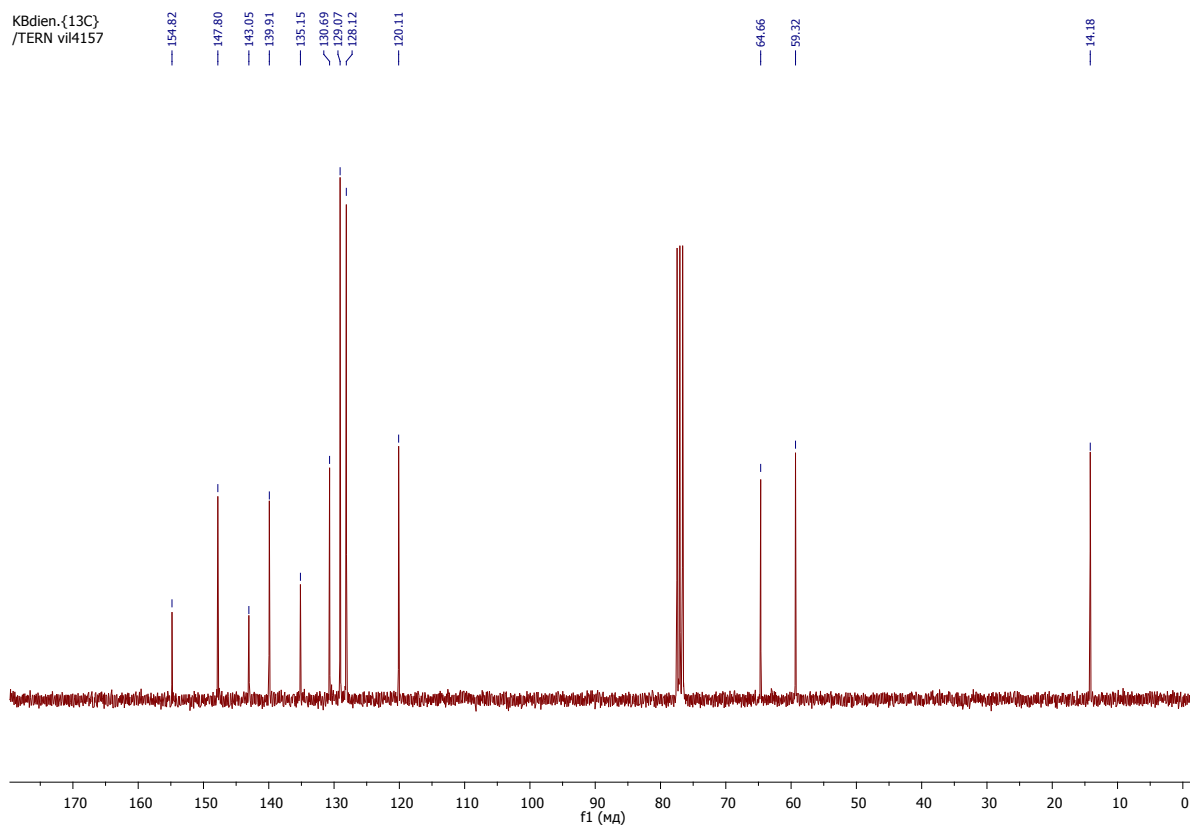

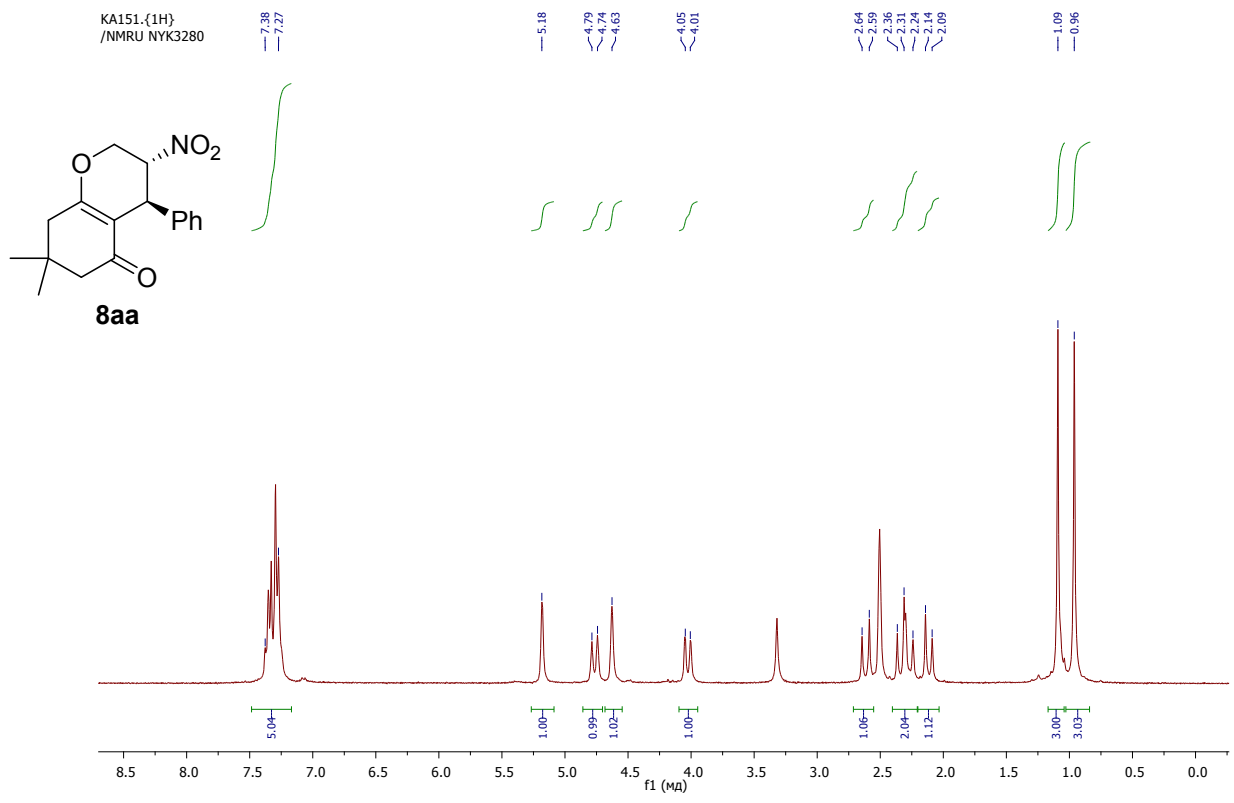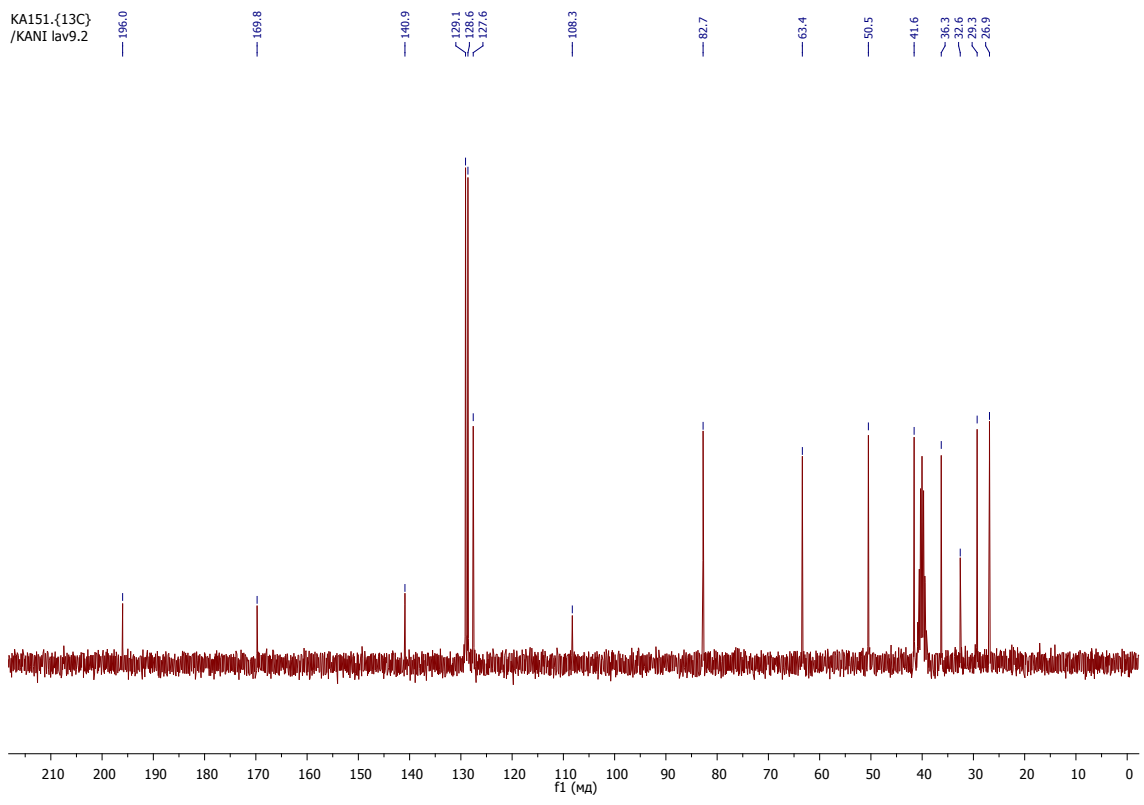

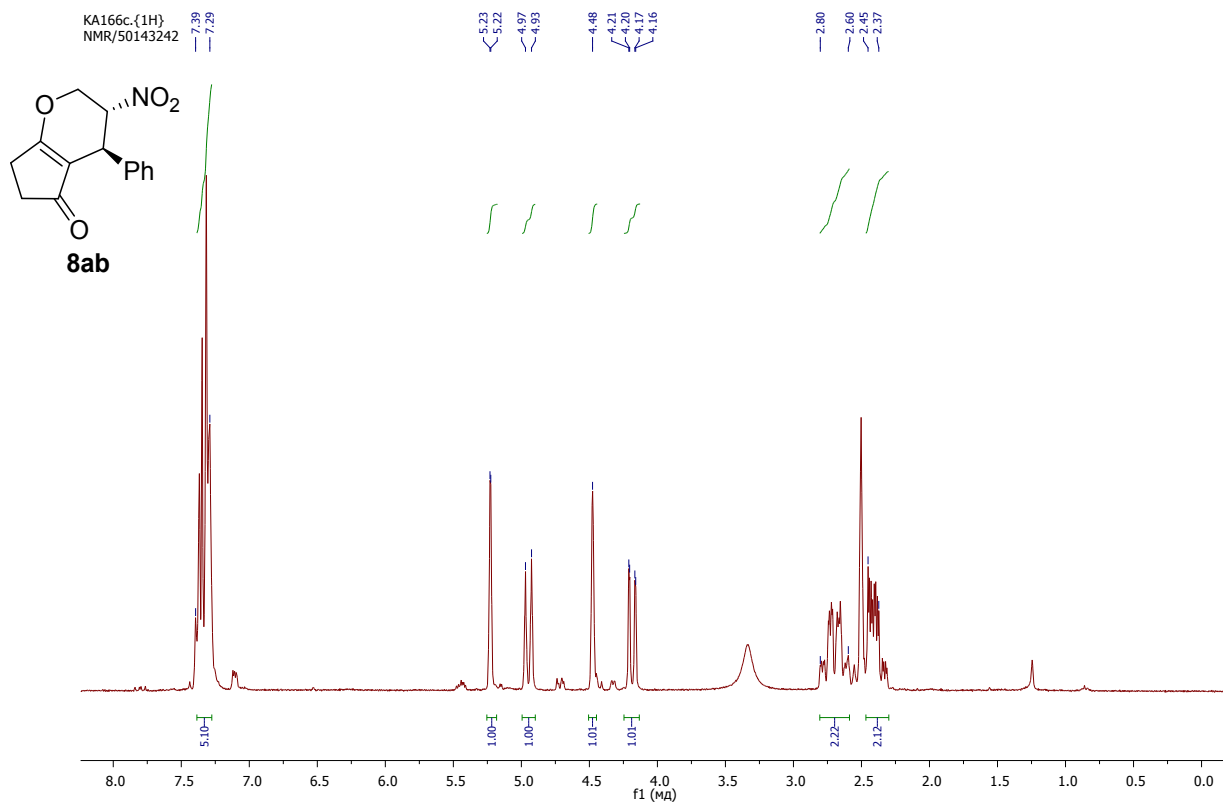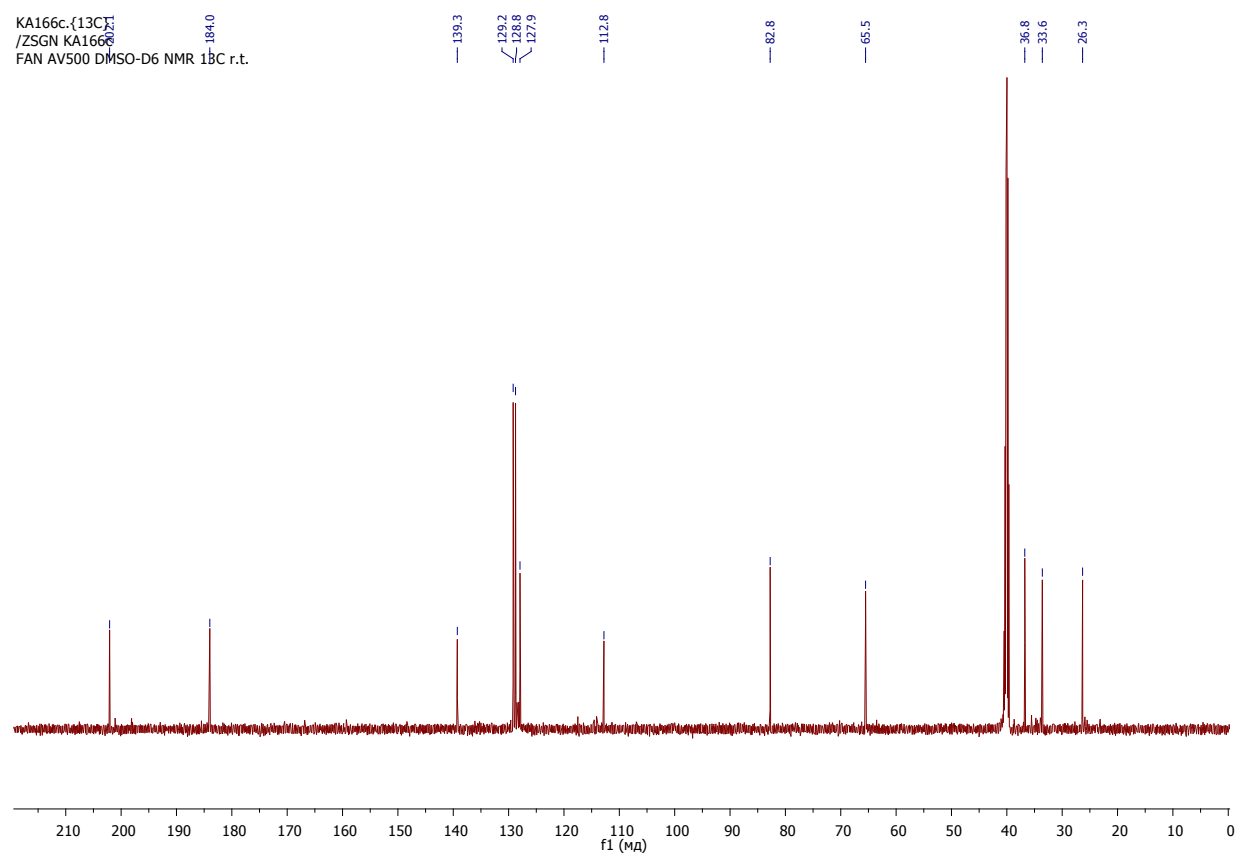

KU10.{1H}  
/MBCI 4MEOS-4MEUV2

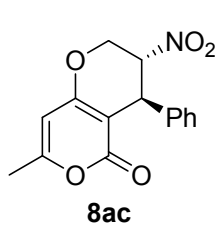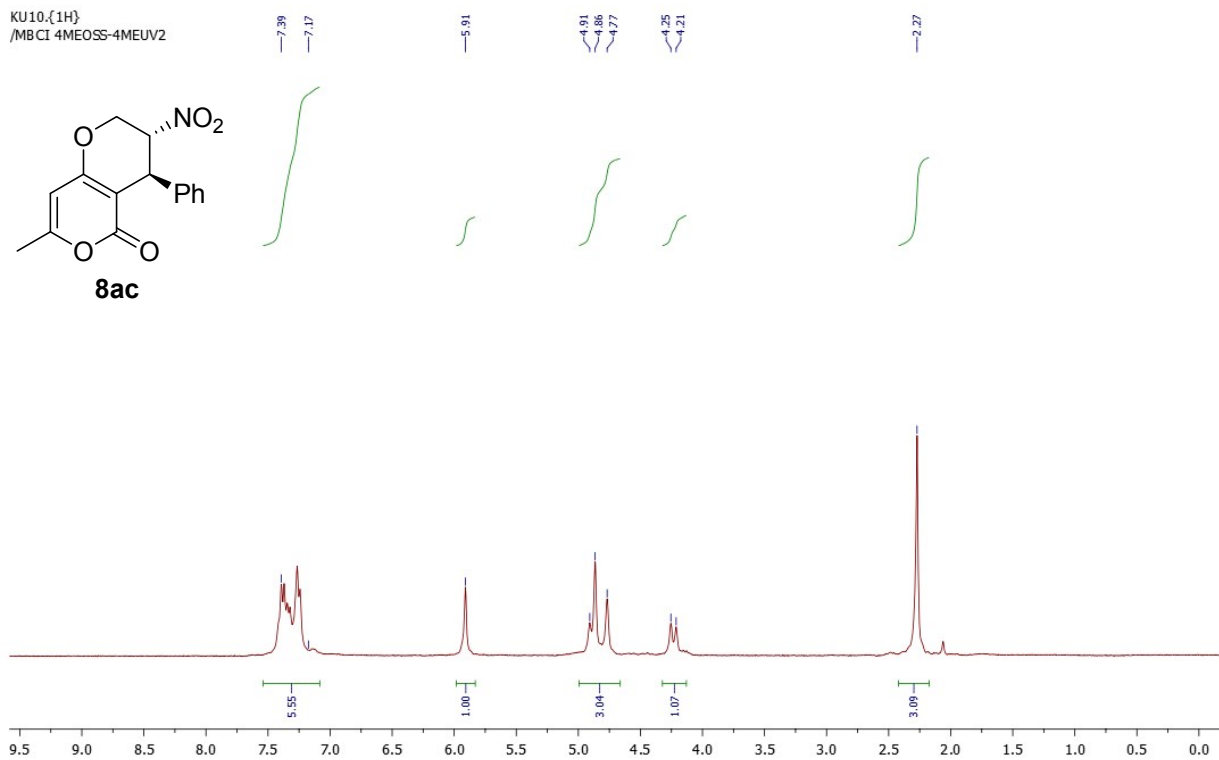

KA157.1.{13C}  
/KANI lav38.1

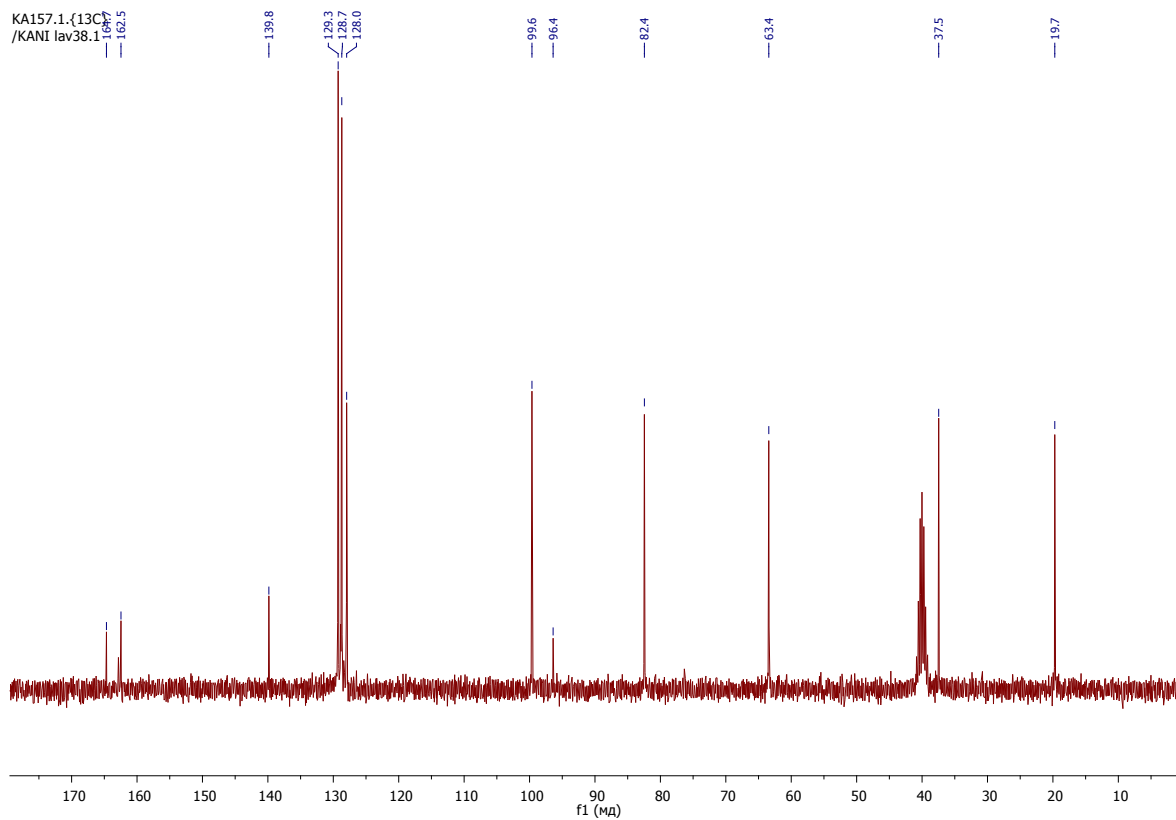



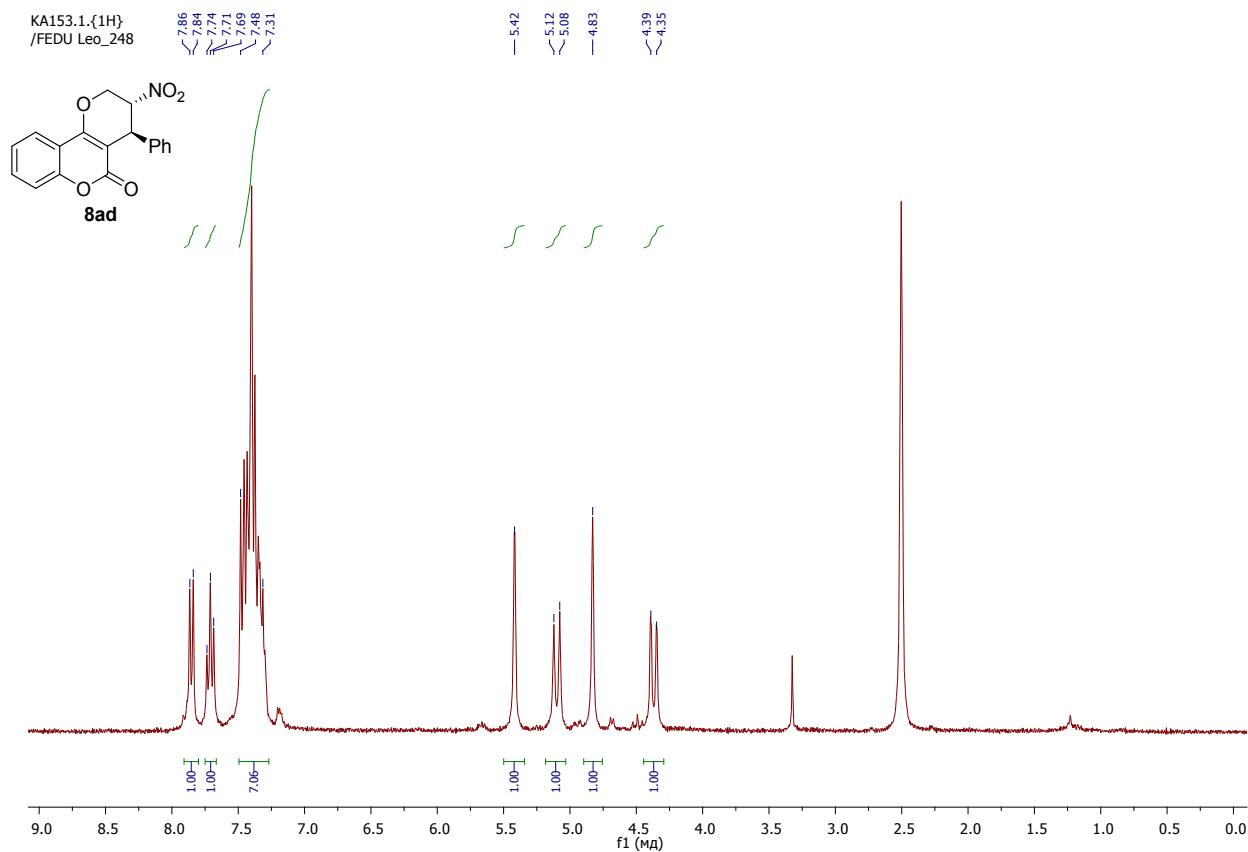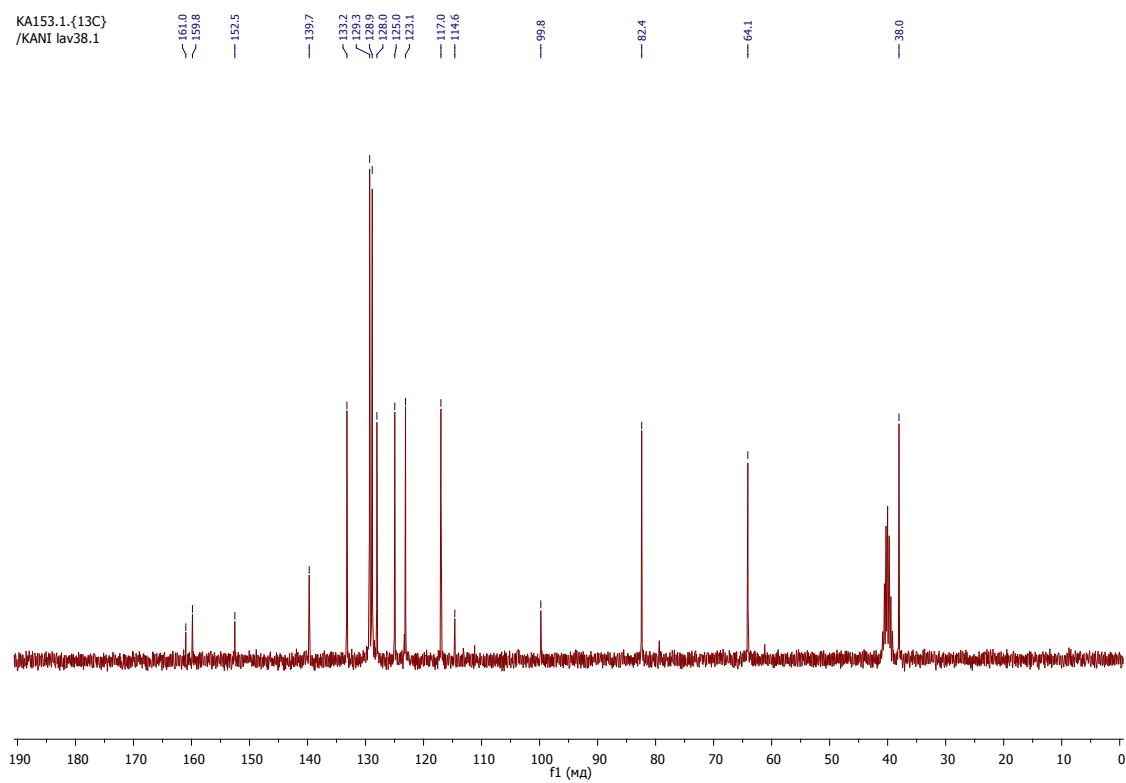

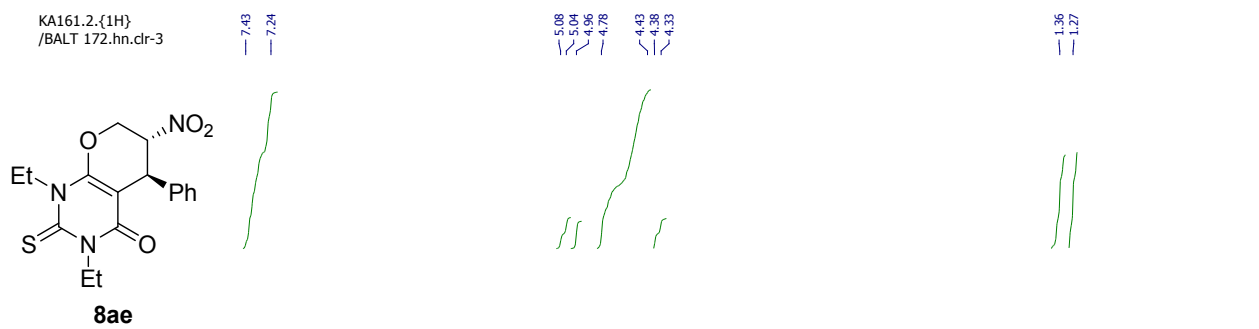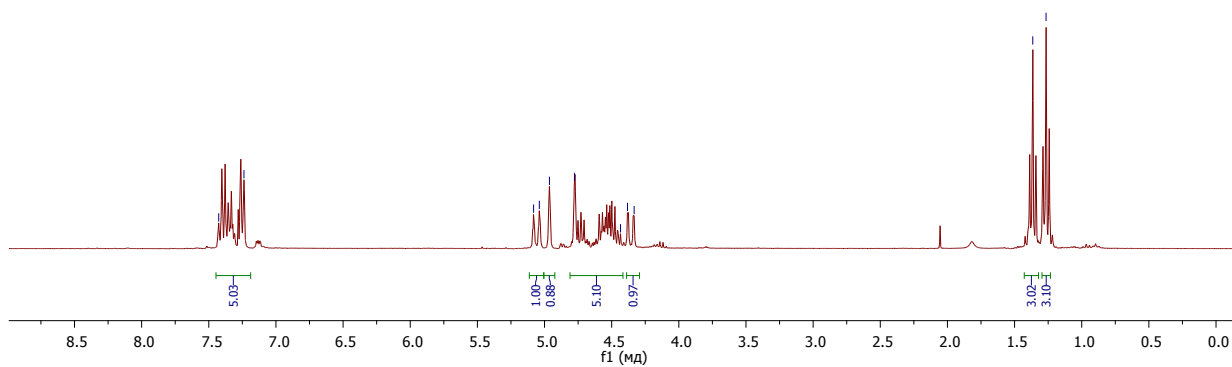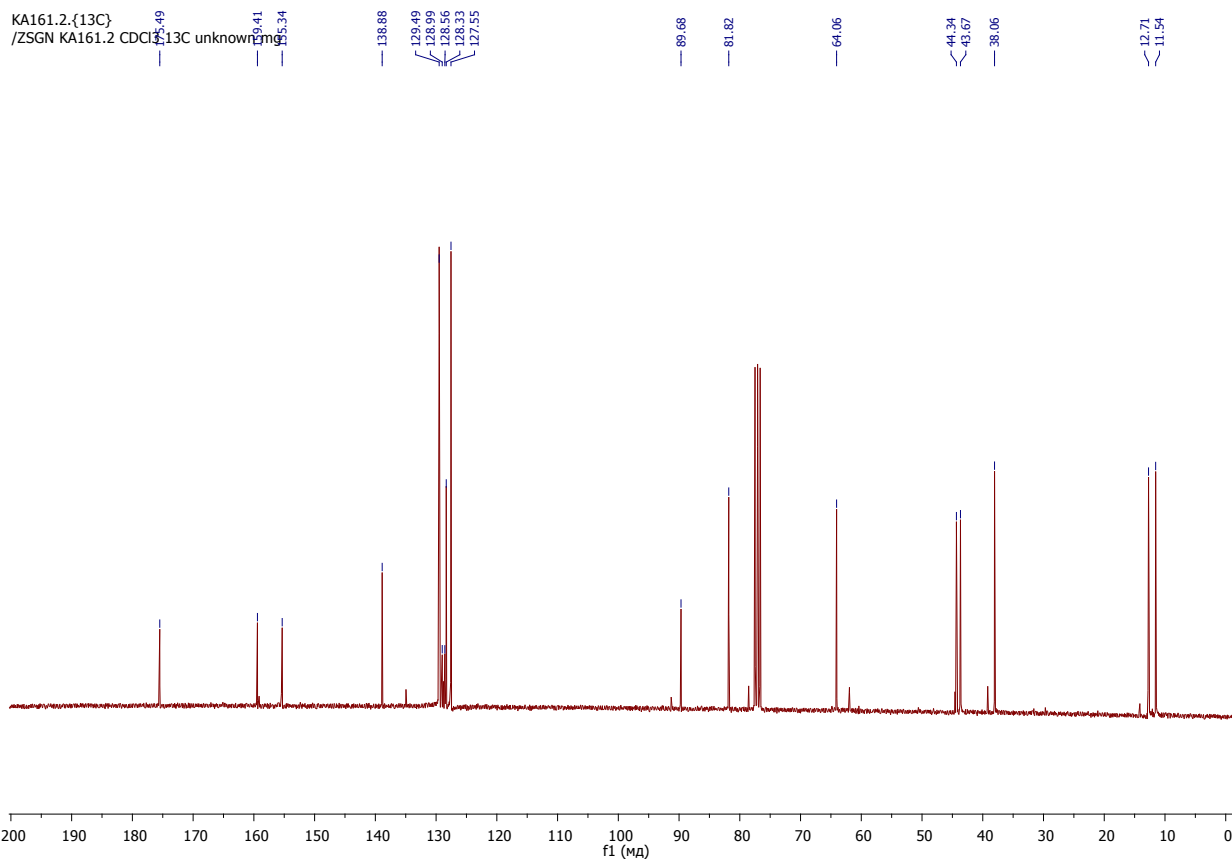

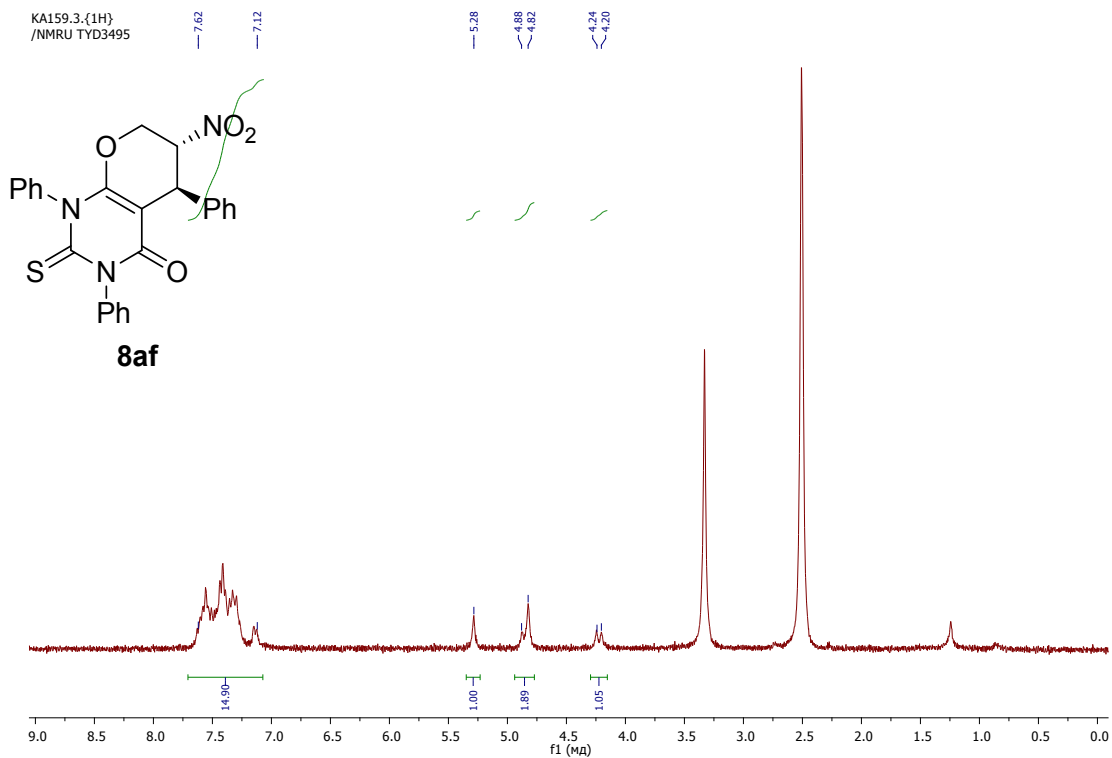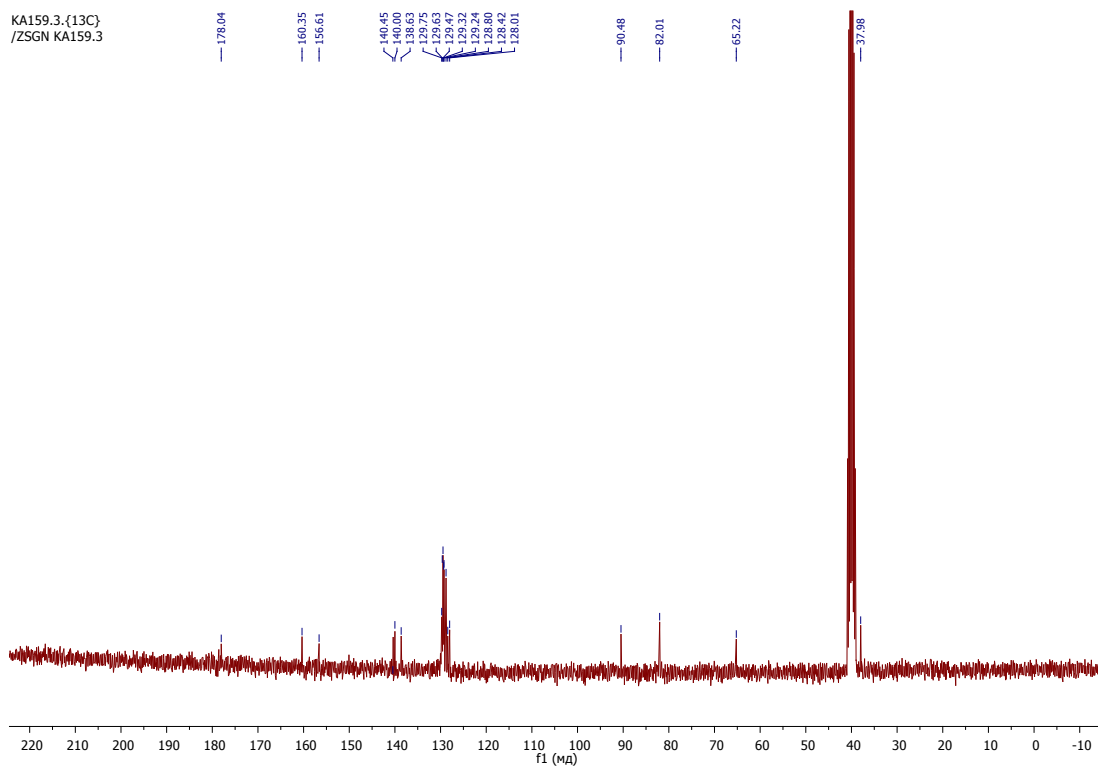

KA152.2.{1H}  
NMR/50145662

8.07  
8.04  
7.93  
7.83  
7.50  
7.48  
7.38  
7.28

5.35

5.02  
4.98

4.24  
4.19

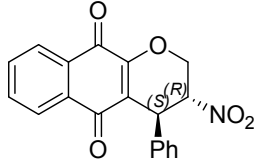

8ag

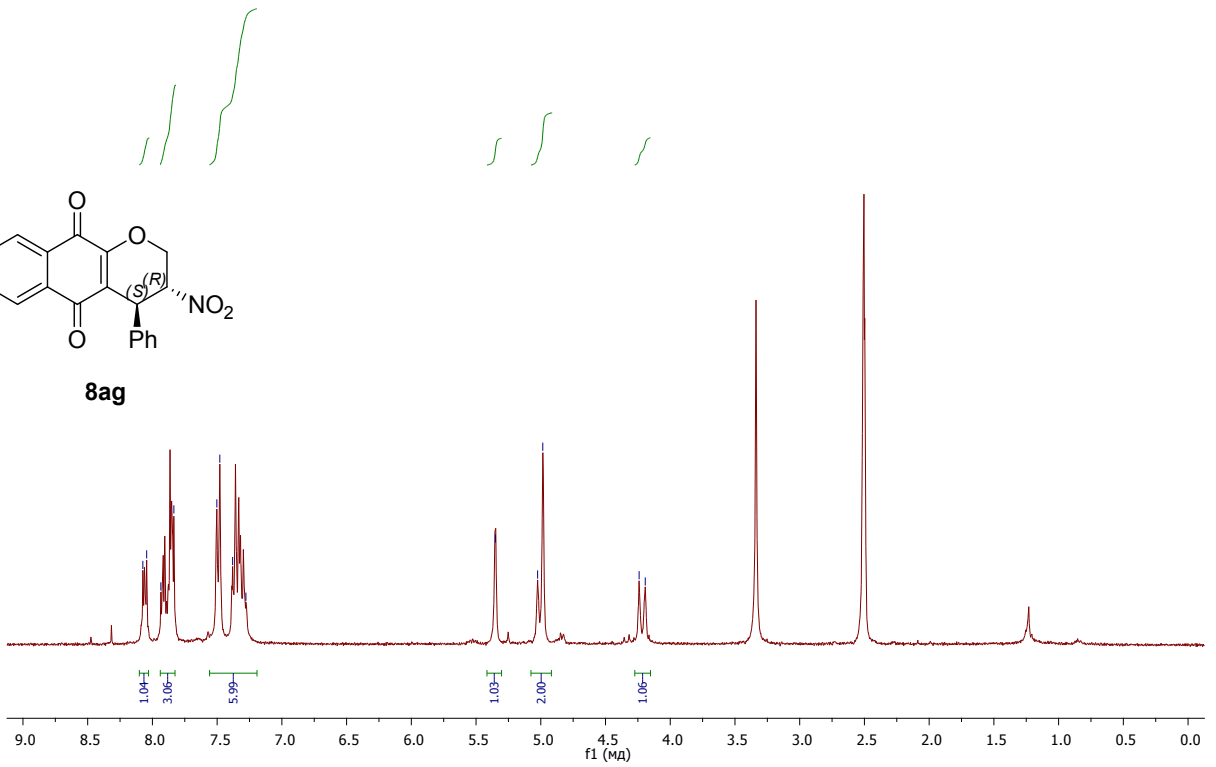

KA152.2.{13C}  
/KANI lav9.2

182.9  
178.4

155.3

140.1

135.0

134.3

129.3

129.0

128.0

126.5

118.8

82.1

63.7

37.2

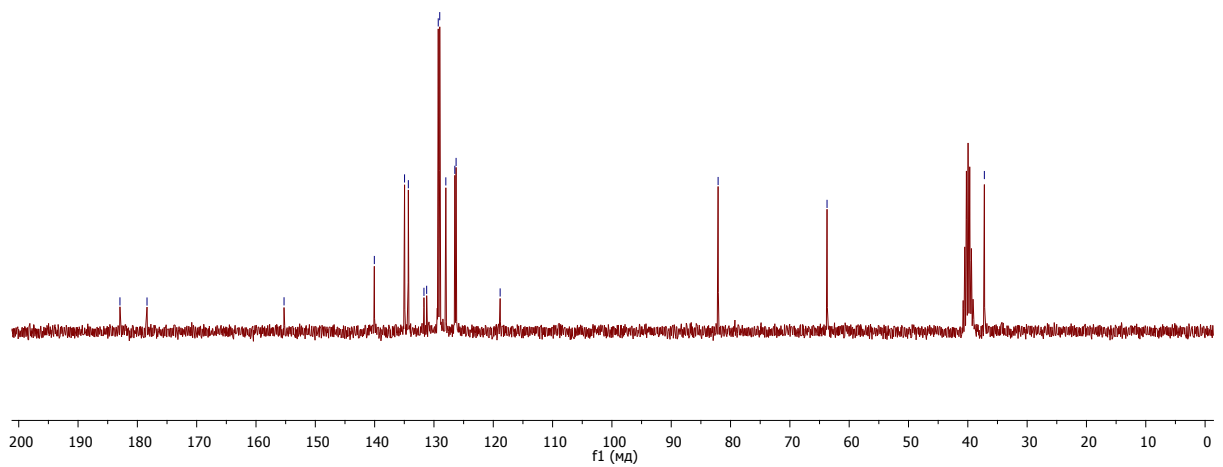

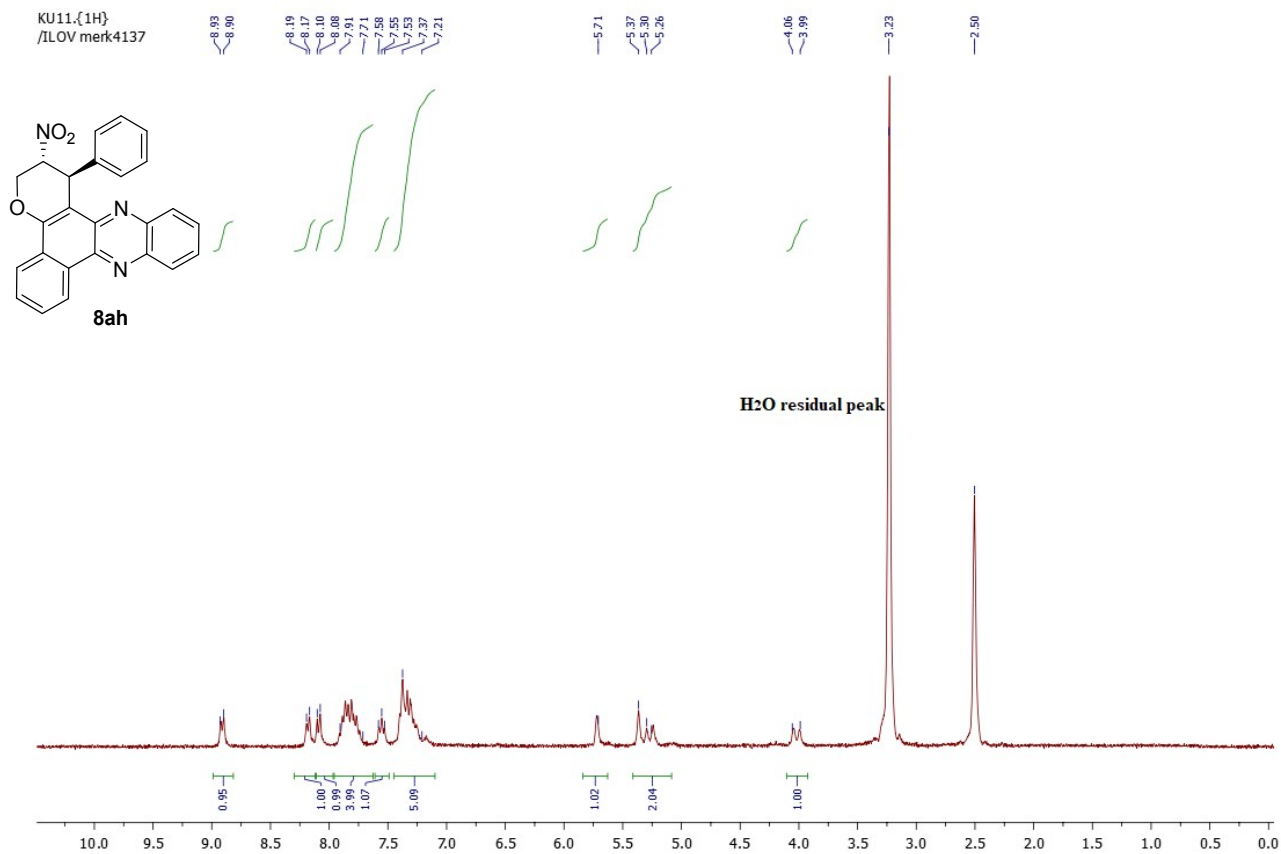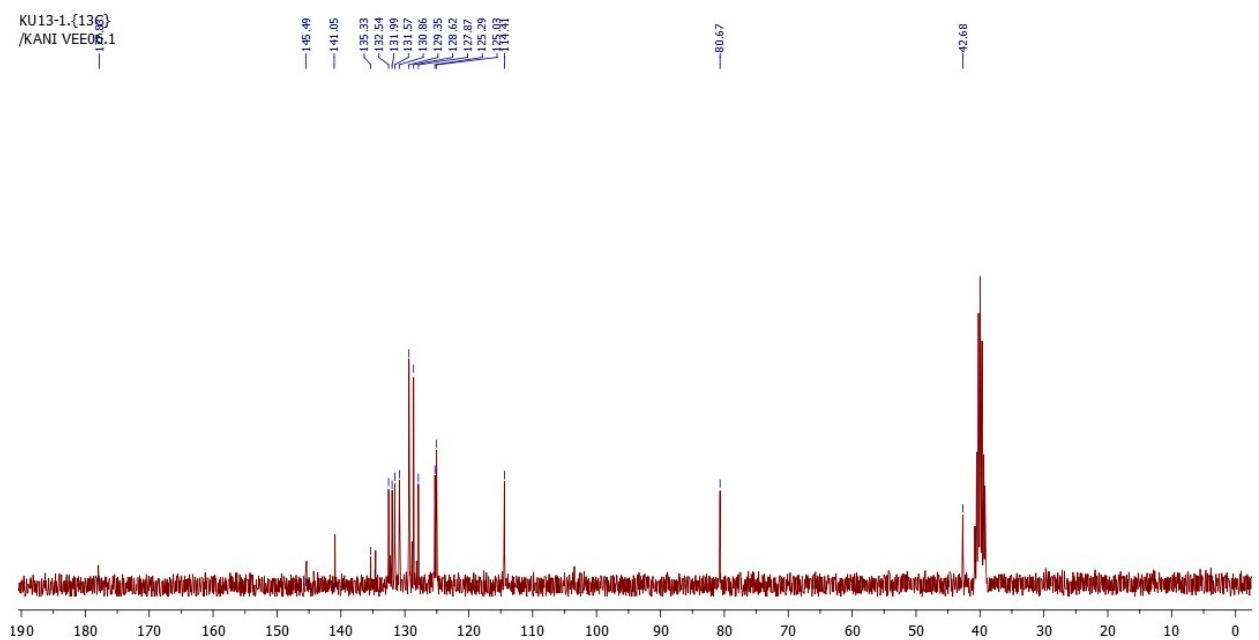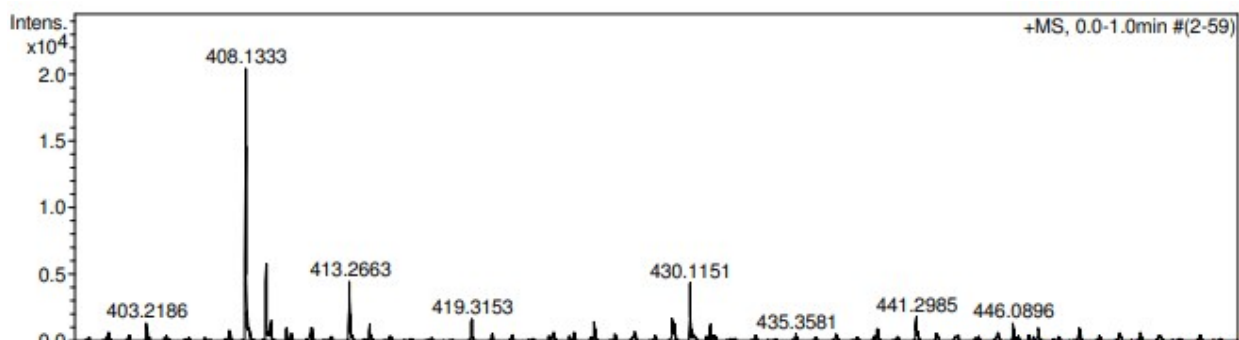

KA182.23.{1H}

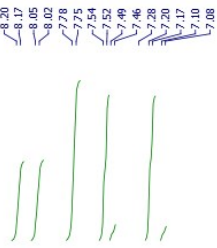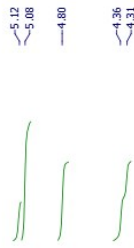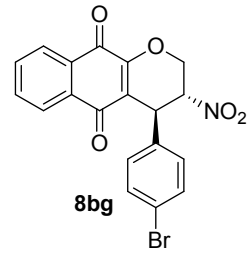

CDCl3 residual peak

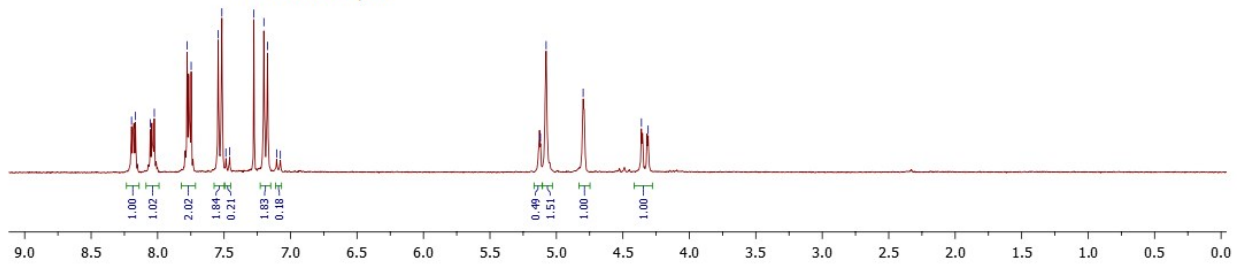

KA182.{13C}  
ZSGN KA182 CDCl3 13C unknown mg

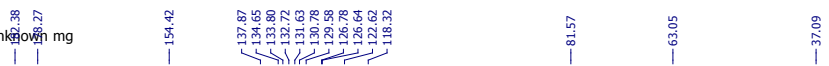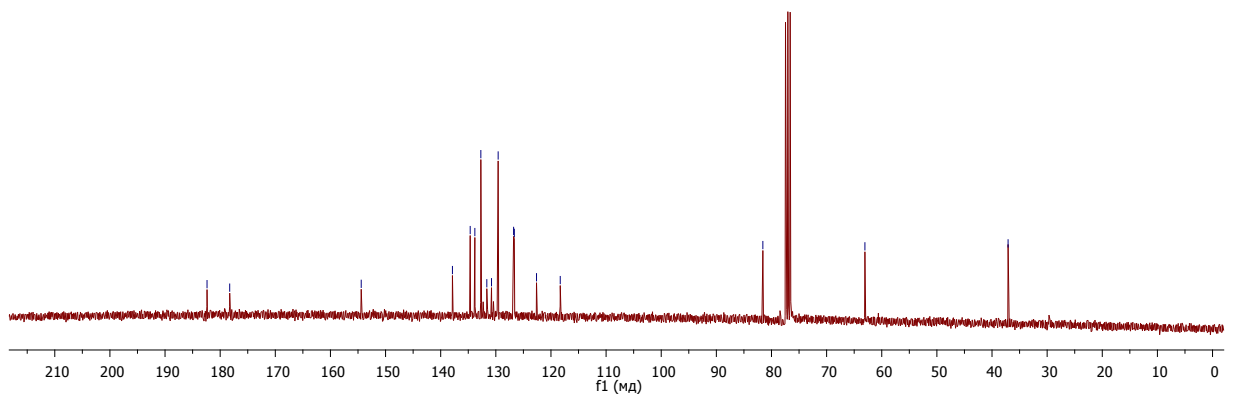

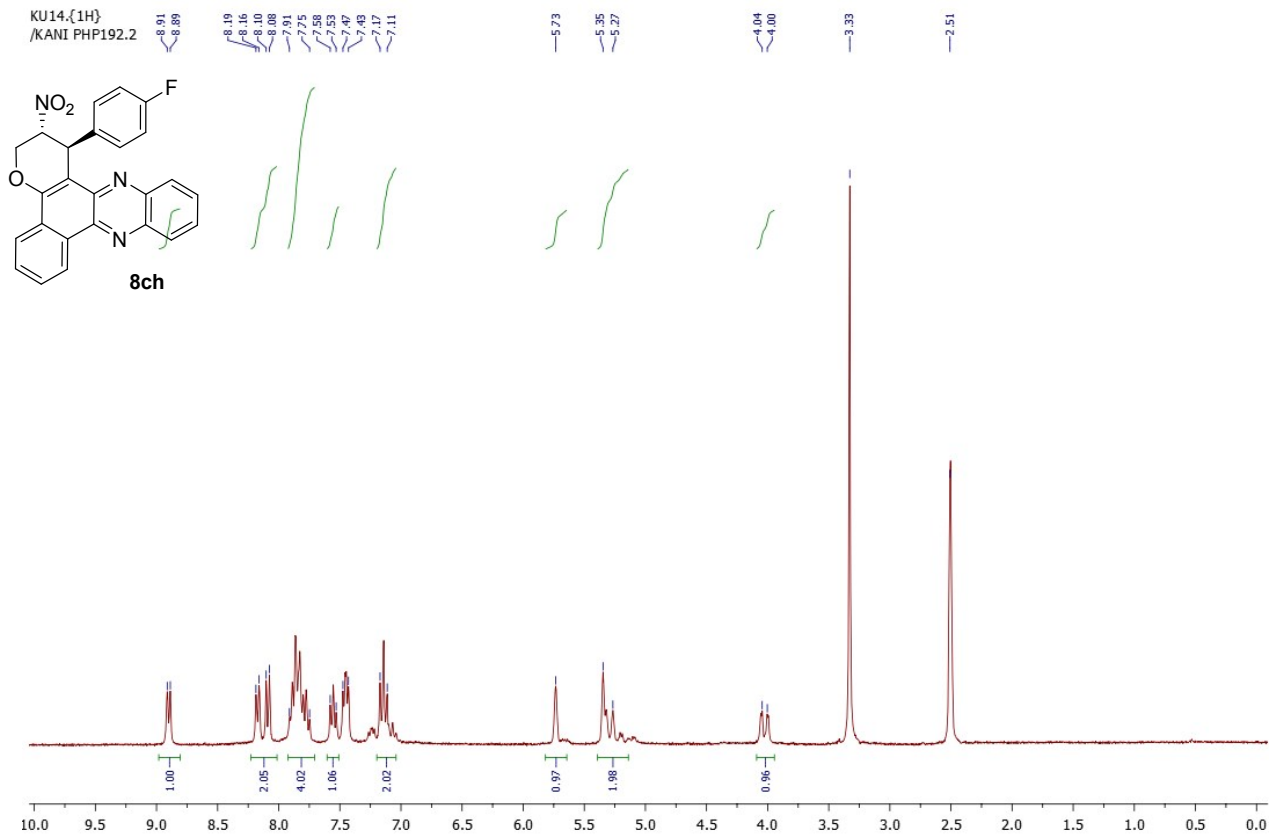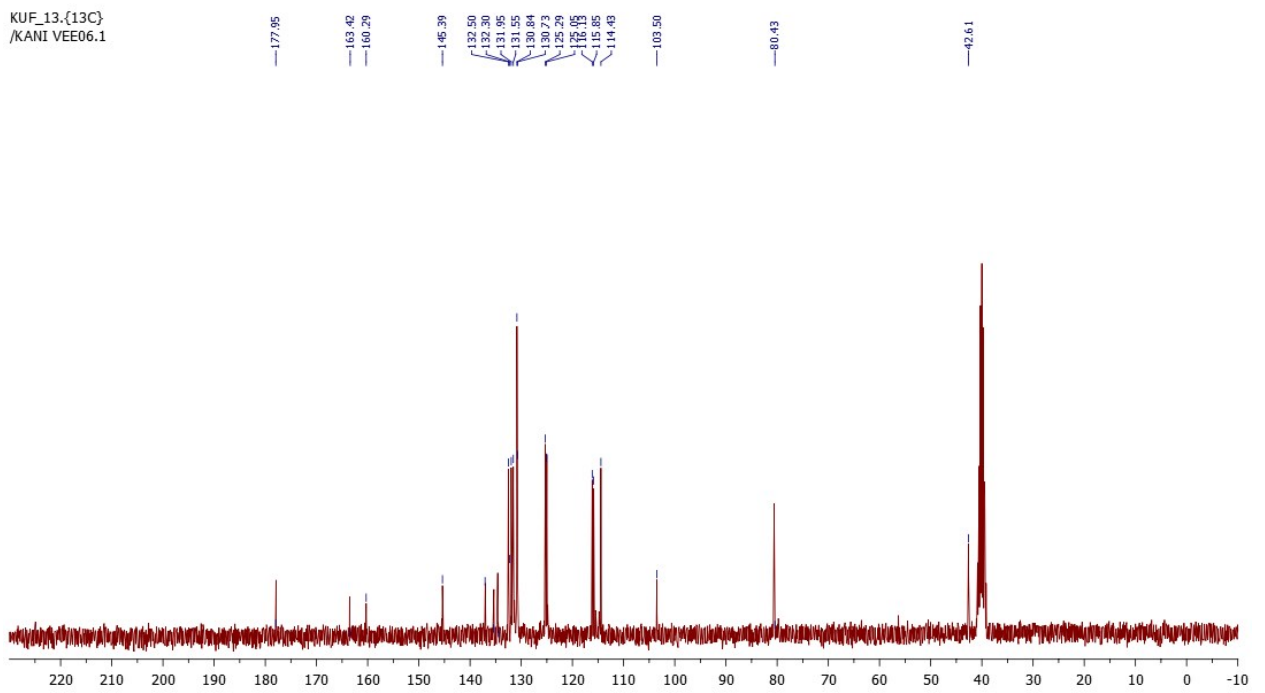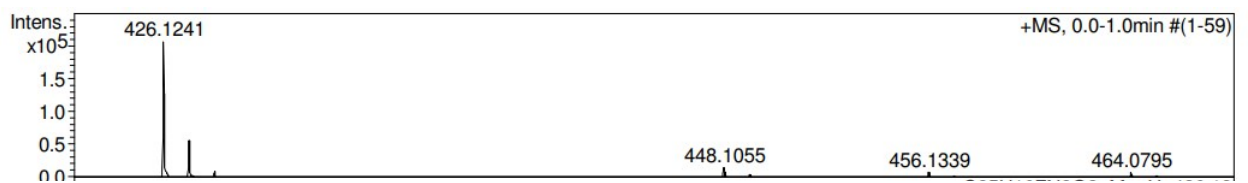

KAthienlawChir.{1H}  
/ZSGN KAthienlawChir

8.05  
7.94  
7.86  
7.51  
7.17  
6.99  
5.44  
5.20  
5.10  
5.06  
4.40  
4.35

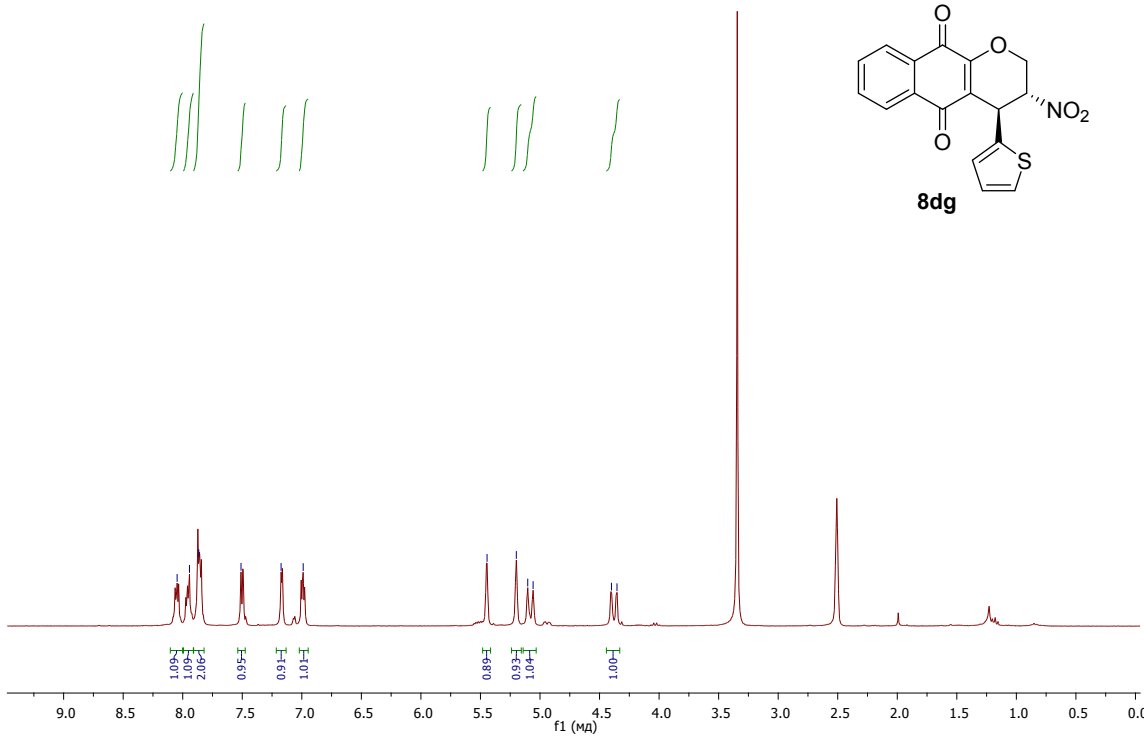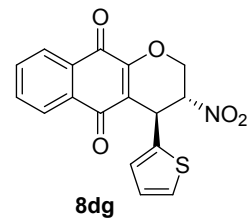

KAthienlawChir.{13C}  
/ZSGN KAthienlawChir

188.73  
178.42  
154.41  
142.38  
135.10  
134.42  
131.09  
128.07  
127.79  
126.65  
126.35  
118.35  
81.49  
64.15  
32.21

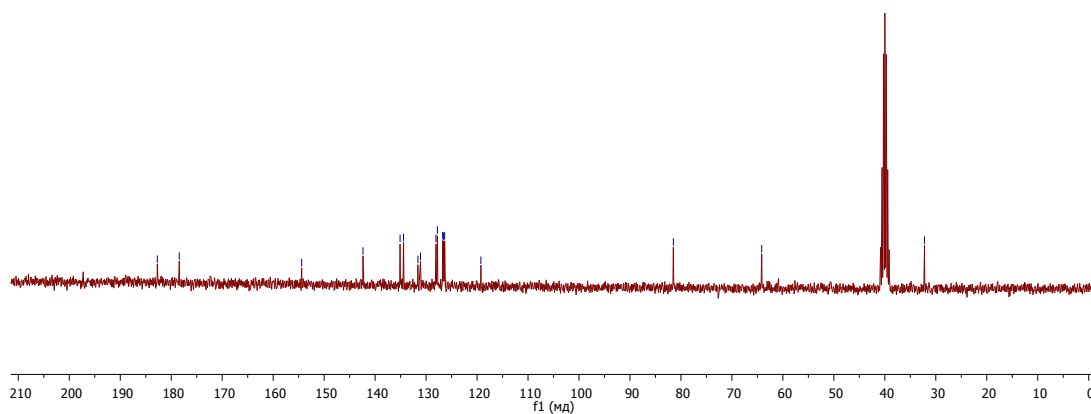



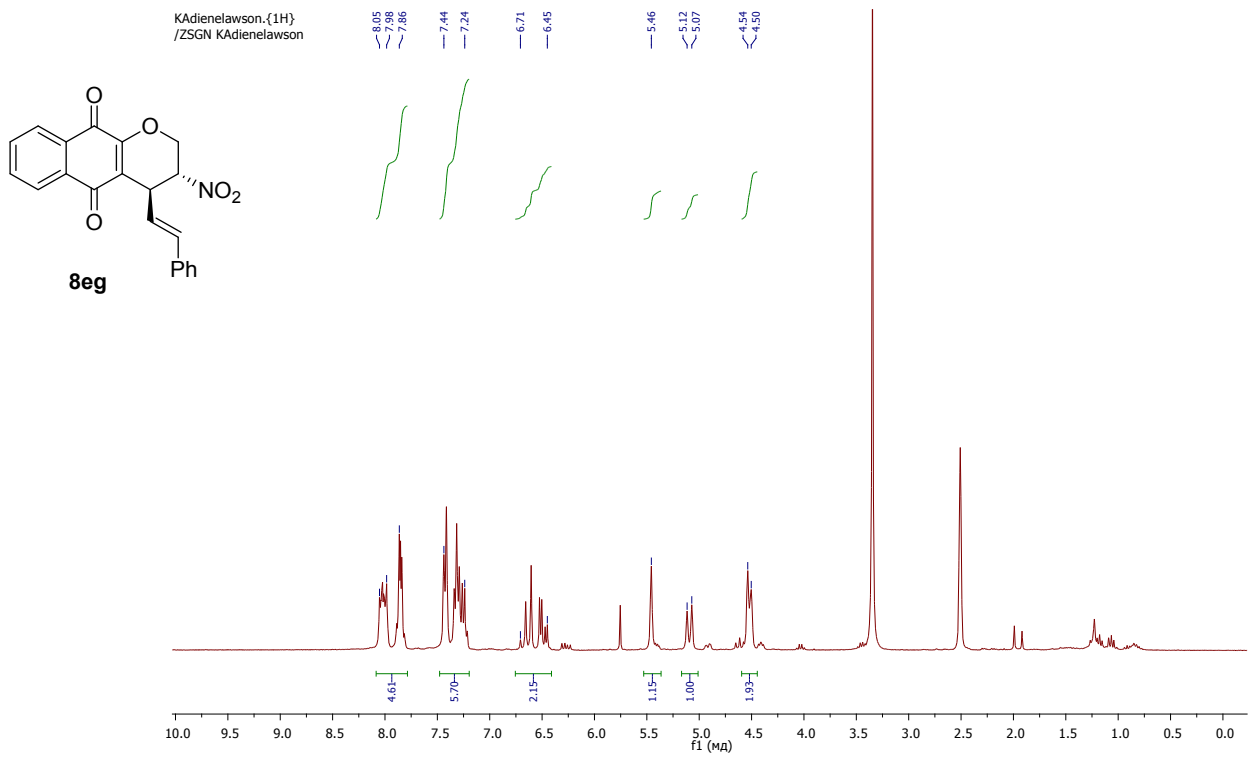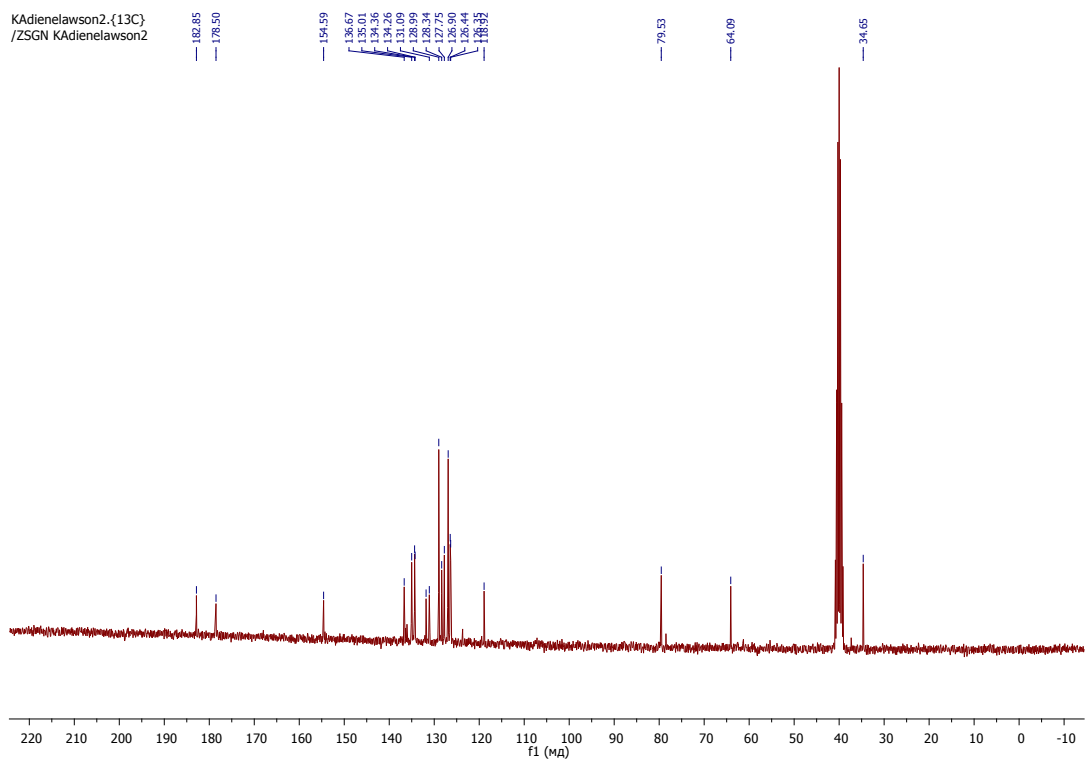

## Determination of *Dr* values for compounds **8** by <sup>1</sup>H NMR

(**8aa**): *Dr* anti/syn = 25:1

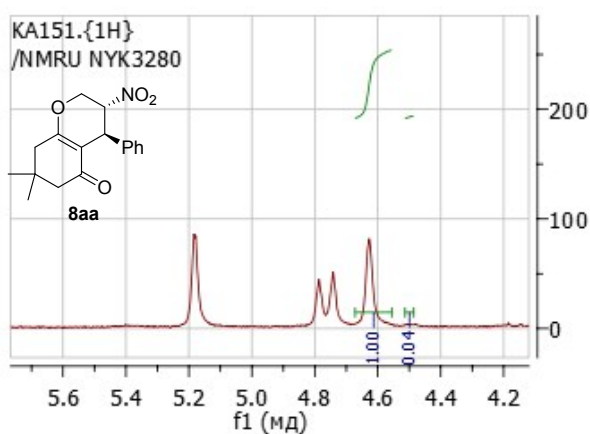

(**8ab**): *Dr* anti/syn = 10:1

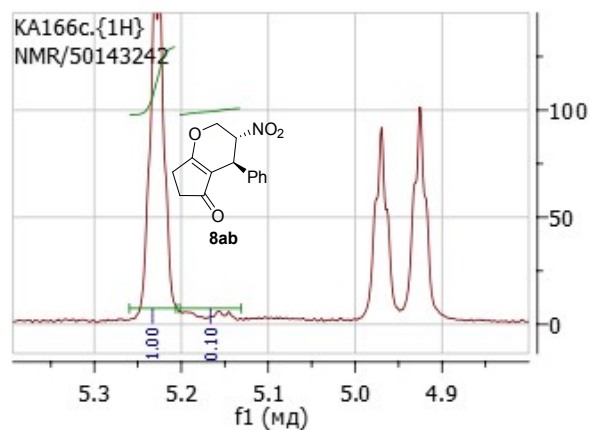

(**8ac**): *Dr* anti/syn = 20:1

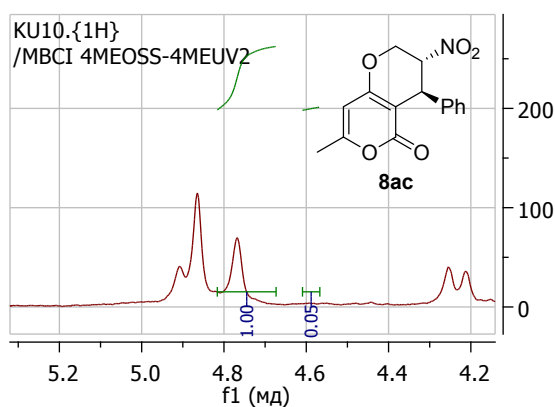

(**8ad**): *Dr* anti/syn = 25:1

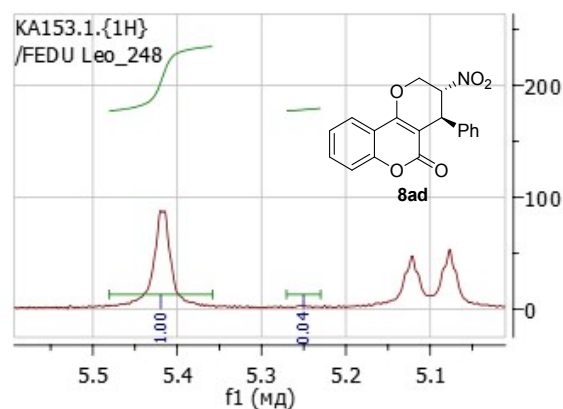

(**8ae**): *Dr* anti/syn = 10:1

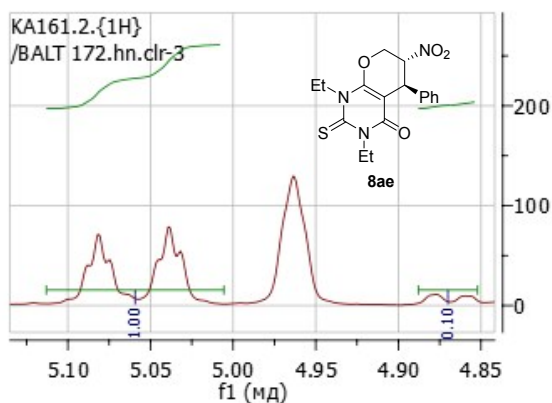

(**8af**): *Dr* anti/syn = 20:1

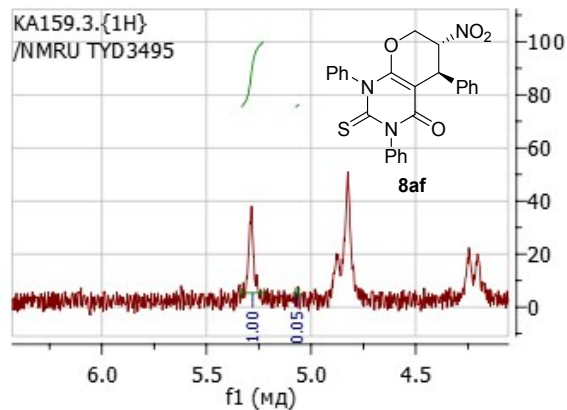

**(8ag):** *Dr* anti/syn = 20:1

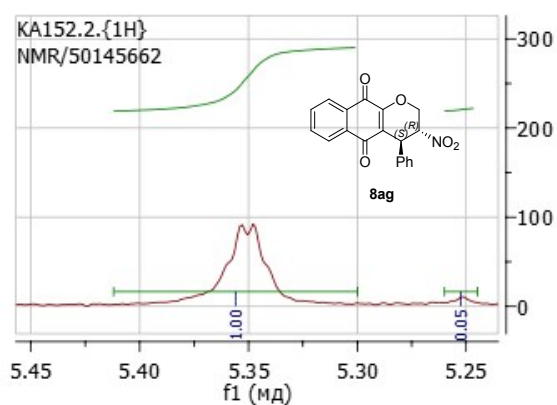

**(8ah):** *Dr* anti/syn = 25:1

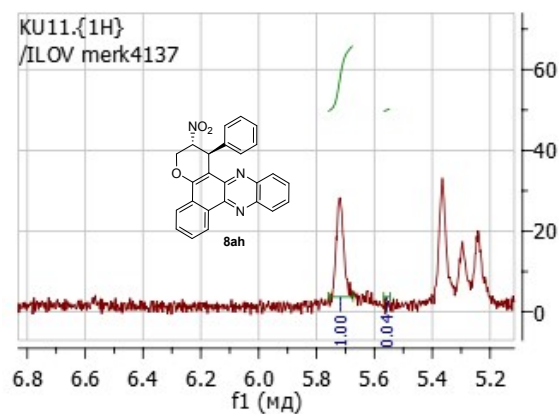

**(8bg):** *Dr* anti/syn = 5.5:1

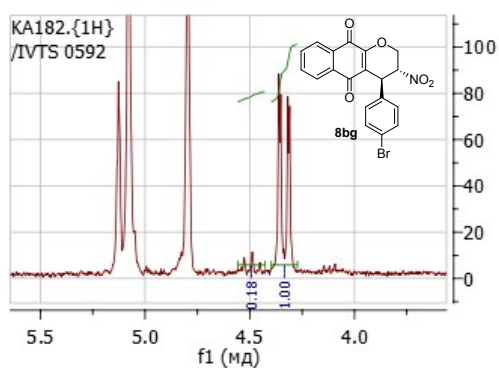

**(8ch):** *Dr* anti/syn = 25:1

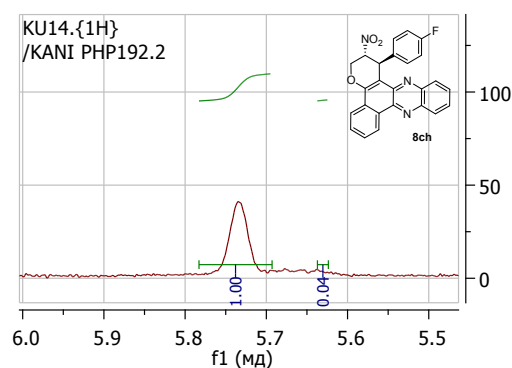

**(8dg):** *Dr* anti/syn = 25:1

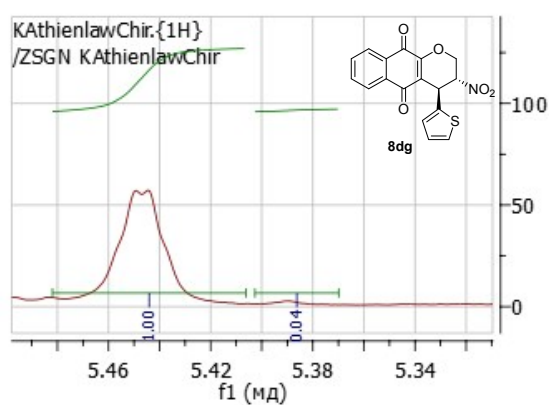

**(8eg):** *Dr* anti/syn = 5:1

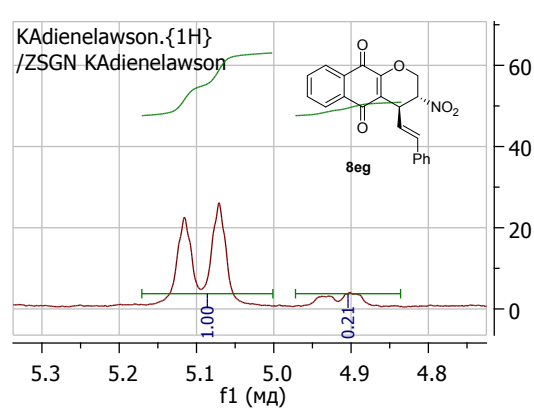

## 5. HPLC data for all Michael adducts 8.

### 7,7-Dimethyl-3-nitro-4-phenyl-3,4,7,8-tetrahydro-2H-chromen-5(6H)-one (8aa):

94% ee [HPLC Chiralpak OD-H, *n*-hexane/*i*PrOH 90:10, 1 mL min<sup>-1</sup>, 254 nm,  $t_{\text{major}} = 30.1$  min,  $t_{\text{minor}} = 25.5$  min].

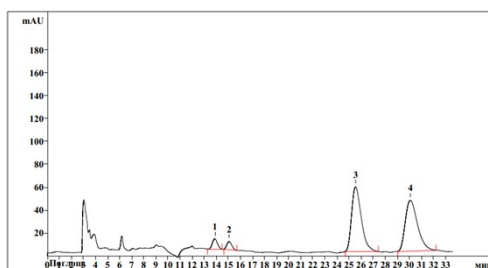

| Пик | Время мин | Высота mAU | Площадь mAU*сек | Площадь % | Конц. |
|-----|-----------|------------|-----------------|-----------|-------|
| 1   | 13.88     | 9.08       | 263.50          | 3.92      | 263.5 |
| 2   | 15.08     | 7.06       | 205.00          | 3.05      | 205   |
| 3   | 25.54     | 56.39      | 3141.52         | 46.71     | 3142  |
| 4   | 30.08     | 44.34      | 3115.75         | 46.33     | 3116  |
| 4   | 33.58     | 116.87     | 6725.78         | 100.00    | 6726  |

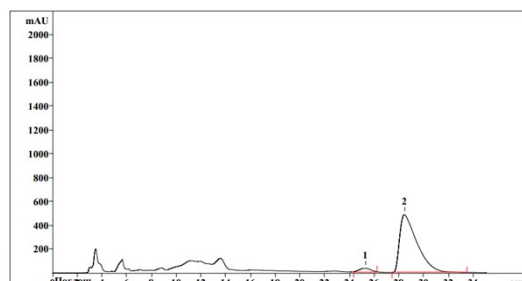

РЕЗУЛЬТАТЫ РАСЧЕТА  
Метод расчета: Заказной  
Стандарт: Нет

| Пик | Время мин | Высота mAU | Площадь mAU*сек | Площадь % | Конц.      |
|-----|-----------|------------|-----------------|-----------|------------|
| 1   | 25.27     | 28.99      | 1741.03         | 3.54      | 1741       |
| 2   | 28.46     | 485.80     | 47494.56        | 96.46     | 4.749e+004 |
| 2   | 35.12     | 514.79     | 49235.58        | 100.00    | 4.924e+004 |

### 3-Nitro-4-phenyl-3,4,6,7-tetrahydrocyclopenta[b]pyran-5(2H)-one (8ab):

65% ee [HPLC Chiralpak AD-H, *n*-hexane/*i*PrOH 90:10, 1 mL min<sup>-1</sup>, 254 nm,  $t_{\text{minor}} = 17.1$  min,  $t_{\text{major}} = 28.9$  min].

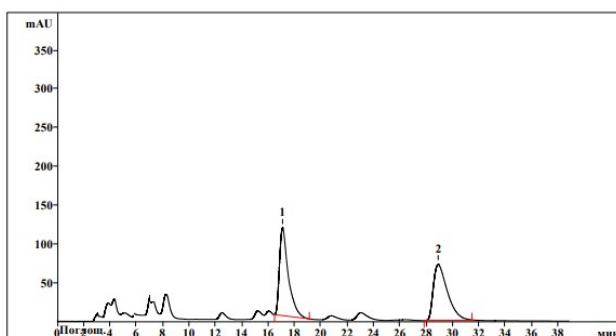

РЕЗУЛЬТАТЫ РАСЧЕТА  
Метод расчета: Заказной  
Стандарт: Нет

| Пик | Время мин | Высота mAU | Площадь mAU*сек | Площадь % | Конц.      |
|-----|-----------|------------|-----------------|-----------|------------|
| 1   | 17.11     | 113.54     | 5309.65         | 50.00     | 5310       |
| 2   | 28.93     | 71.87      | 5308.85         | 50.00     | 5309       |
| 2   | 38.88     | 185.41     | 10618.50        | 100.00    | 1.062e+004 |

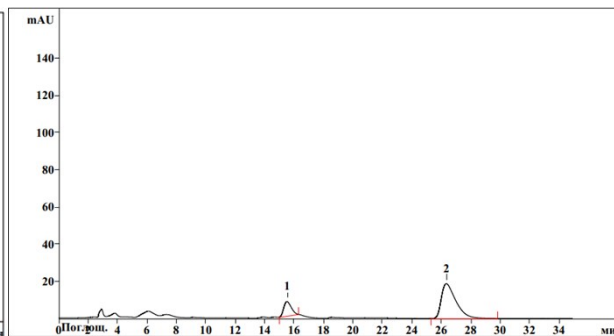

РЕЗУЛЬТАТЫ РАСЧЕТА  
Метод расчета: Заказной  
Стандарт: Нет

| Пик | Время мин | Высота mAU | Площадь mAU*сек | Площадь % | Конц. |
|-----|-----------|------------|-----------------|-----------|-------|
| 1   | 15.51     | 7.73       | 272.43          | 17.68     | 272.4 |
| 2   | 26.35     | 18.66      | 1268.90         | 82.32     | 1269  |
| 2   | 34.93     | 26.39      | 1541.33         | 100.00    | 1541  |

### 7-Methyl-3-nitro-4-phenyl-3,4-dihydropyrano[4,3-b]pyran-5(2H)-one (8ac):

86% ee [HPLC Chiralpak AD-H, *n*-hexane/*i*PrOH 70:30, 1 mL min<sup>-1</sup>, 220 nm,  $t_{\text{major}} = 17.8$  min,  $t_{\text{minor}} = 12.7$  min].

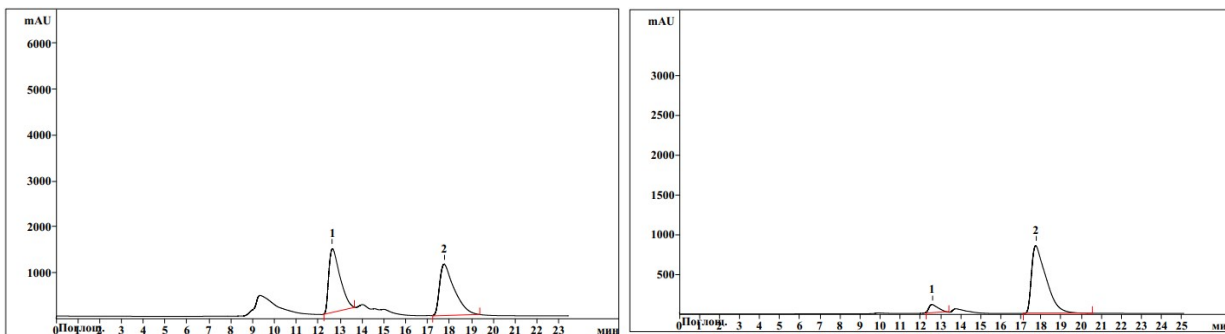

| Пик | Время мин | Высота мAU | Площадь мAU*сек | Площадь % |
|-----|-----------|------------|-----------------|-----------|
| 1   | 12.66     | 1381.91    | 49342.74        | 48.62     |
| 2   | 17.76     | 1114.78    | 52145.54        | 51.38     |
| 2   | 23.46     | 2496.68    | 101488.28       | 100.00    |

| Пик | Время мин | Высота мAU | Площадь мAU*сек | Площадь % |
|-----|-----------|------------|-----------------|-----------|
| 1   | 12.58     | 98.33      | 3183.49         | 6.90      |
| 2   | 17.74     | 852.16     | 42951.56        | 93.10     |
| 2   | 25.12     | 950.49     | 46135.05        | 100.00    |

### 3-Nitro-4-phenyl-3,4-dihydropyrano[3,2-c]chromen-5(2H)-one (8ad):

70% ee [HPLC Chiralpak AD-H, *n*-hexane/*i*PrOH 70:30, 1 mL min<sup>-1</sup>, 254 nm,  $t_{\text{major}} = 14.6$  min,  $t_{\text{minor}} = 8.9$  min].

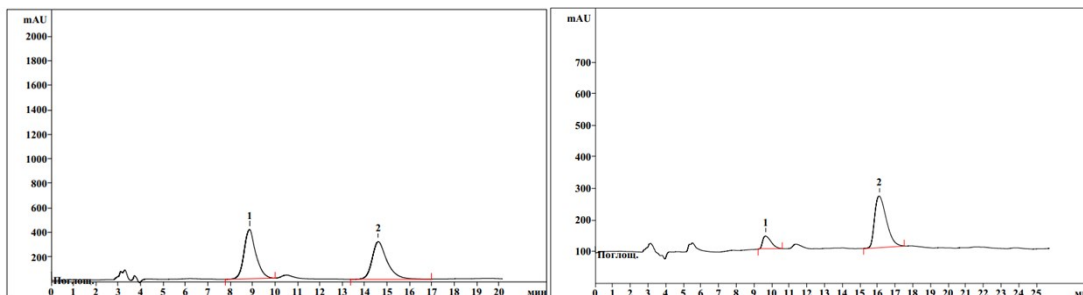

| Пик | Время мин | Высота мAU | Площадь мAU*сек | Площадь % |
|-----|-----------|------------|-----------------|-----------|
| 1   | 8.861     | 401.17     | 14736.18        | 50.90     |
| 2   | 14.61     | 306.60     | 14212.91        | 49.10     |
| 2   | 34.47     | 707.77     | 28949.09        | 100.00    |

| Пик | Время мин | Высота мAU | Площадь мAU*сек | Площадь % |
|-----|-----------|------------|-----------------|-----------|
| 1   | 9.659     | 40.80      | 1366.50         | 15.40     |
| 2   | 16.09     | 163.32     | 7505.00         | 84.60     |
| 2   | 25.76     | 204.11     | 8871.50         | 100.00    |

**1,3-Diethyl-6-nitro-5-phenyl-2-thioxo-2,3,6,7-tetrahydro-1H-pyrano[2,3-d]pyrimidin-4(5H)-one (8ae):**

91% ee [HPLC Chiralpak IB-H, *n*-hexane/DCM 60:40, 0.7 mL min<sup>-1</sup>, 220 nm,  $t_{\text{minor}} = 10.1$  min,  $t_{\text{major}} = 14.6$  min].

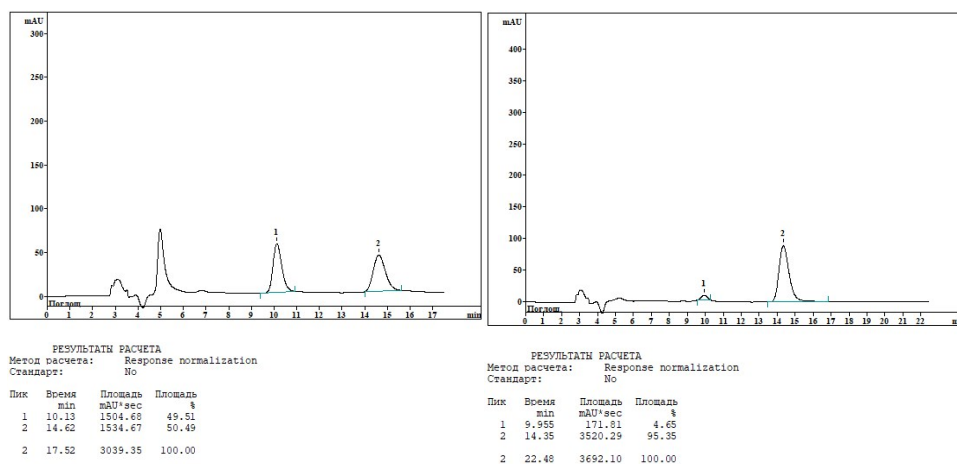

**6-Nitro-1,3,5-triphenyl-2-thioxo-2,3,6,7-tetrahydro-1H-pyrano[2,3-d]pyrimidin-4(5H)-one (8af):**

91% ee [HPLC Chiralpak IB-H, *n*-hexane/DCM 70:30, 0.6 mL min<sup>-1</sup>, 220 nm,  $t_{\text{major}} = 10.6$  min,  $t_{\text{minor}} = 12.7$  min.]

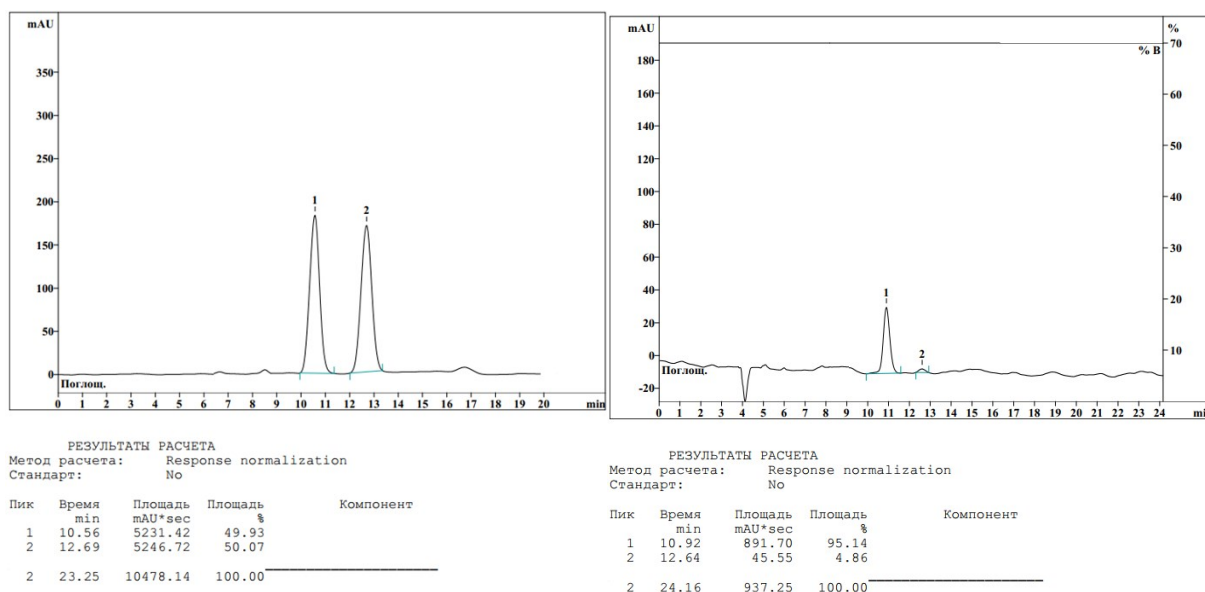

**3-Nitro-4-phenyl-3,4-dihydro-2H-benzo[g]chromene-5,10-dione (8ag):**

99% ee [HPLC Chiralpak OJ-H, *n*-hexane/*i*PrOH 70:30, 1 mL min<sup>-1</sup>, 220 nm, *t*<sub>major</sub> = 10.6 min, *t*<sub>minor</sub> = 5.9 min].

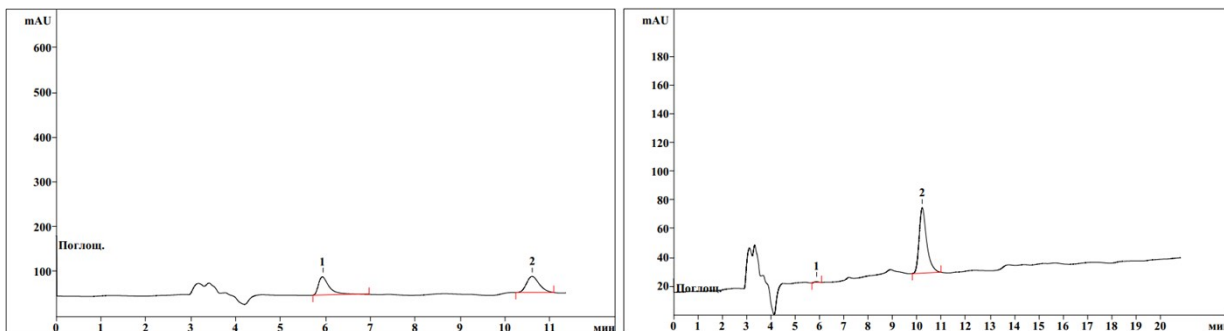

| Пик | Время мин | Высота mAU | Площадь mAU*сек | Площадь % |
|-----|-----------|------------|-----------------|-----------|
| 1   | 5.935     | 40.89      | 718.16          | 50.26     |
| 2   | 10.61     | 36.29      | 710.80          | 49.74     |
| 2   | 24.73     | 77.18      | 1428.96         | 100.00    |

| Пик | Время мин | Высота mAU | Площадь mAU*сек | Площадь % |
|-----|-----------|------------|-----------------|-----------|
| 1   | 5.875     | 0.76       | 8.69            | 0.88      |
| 2   | 10.22     | 45.56      | 979.38          | 99.12     |
| 2   | 20.83     | 46.33      | 988.06          | 100.00    |

**2-Nitro-1-phenyl-2,3-dihydro-1H-benzo[a]pyrano[2,3-c]phenazine (8ah):**

90% ee [HPLC Chiralpak AD-H, *n*-hexane/*i*PrOH 70:30, 1 mL min<sup>-1</sup>, 220 nm, *t*<sub>major</sub> = 12.3 min, *t*<sub>minor</sub> = 87.9 min].

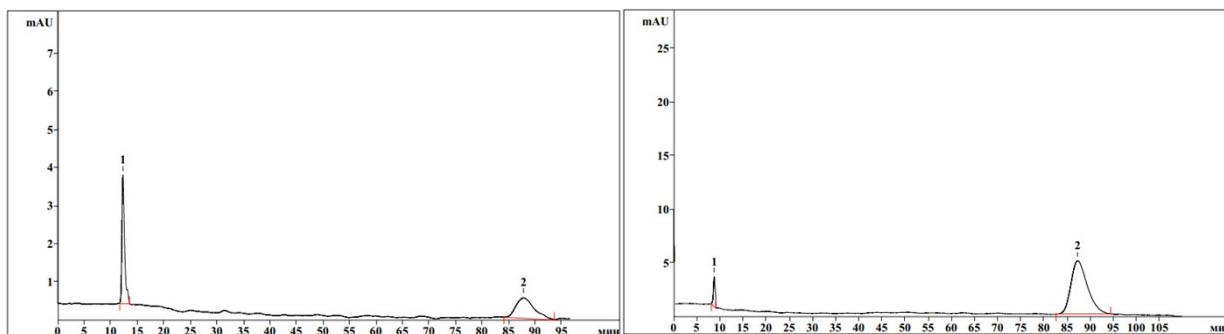

РЕЗУЛЬТАТЫ РАСЧЕТА  
Метод расчета: Заказной  
Стандарт: Нет

| Пик | Время мин | Высота mAU | Площадь mAU*сек | Площадь % |
|-----|-----------|------------|-----------------|-----------|
| 1   | 12.33     | 3.37       | 118.91          | 48.60     |
| 2   | 87.89     | 0.53       | 125.77          | 51.40     |
| 2   | 96.53     | 3.91       | 244.68          | 100.00    |

РЕЗУЛЬТАТЫ РАСЧЕТА  
Метод расчета: Заказной  
Стандарт: Нет

| Пик | Время мин | Высота mAU | Площадь mAU*сек | Площадь % |
|-----|-----------|------------|-----------------|-----------|
| 1   | 8.822     | 2.79       | 77.39           | 5.90      |
| 2   | 87.33     | 4.98       | 1233.16         | 94.10     |
| 2   | 109.8     | 7.76       | 1310.54         | 100.00    |

#### 4-(4-bromophenyl)-3-nitro-3,4-dihydro-2H-benzo[g]chromene-5,10-dione (8bg):

97% ee [HPLC Chiralpak OD-H, *n*-hexane/*i*PrOH 70:30, 1 mL min<sup>-1</sup>, 220 nm,  $t_{\text{major}} = 28.7$  min,  $t_{\text{minor}} = 41.8$  min].

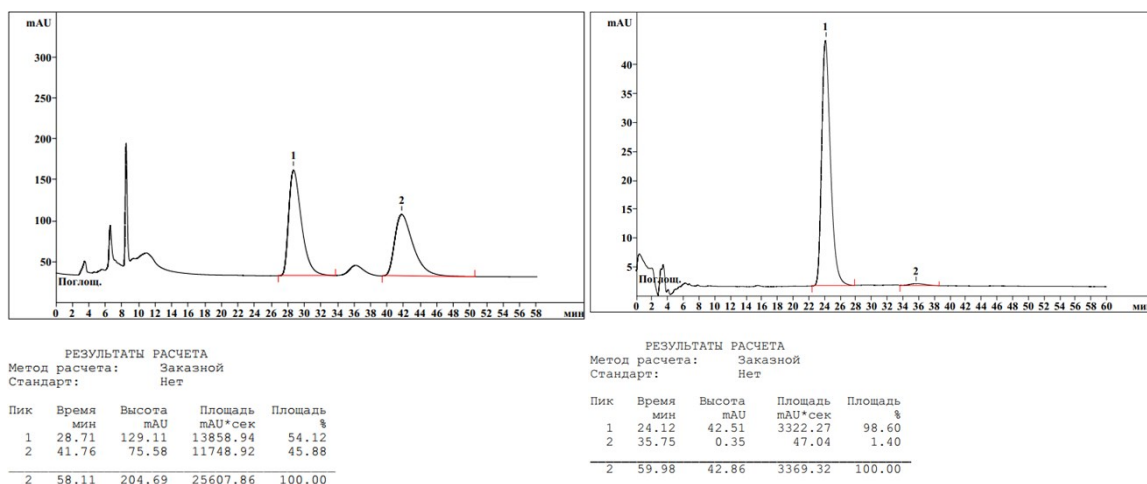

#### 1-(4-Fluorophenyl)-2-nitro-2,3-dihydro-1H-benzo[a]pyrano[2,3-c]phenazine (8ch):

94% ee [HPLC Chiralpak AD-H, *n*-hexane/*i*PrOH 70:30, 1 mL min<sup>-1</sup>, 220 nm,  $t_{\text{major}} = 61.7$  min,  $t_{\text{minor}} = 9.2$  min].

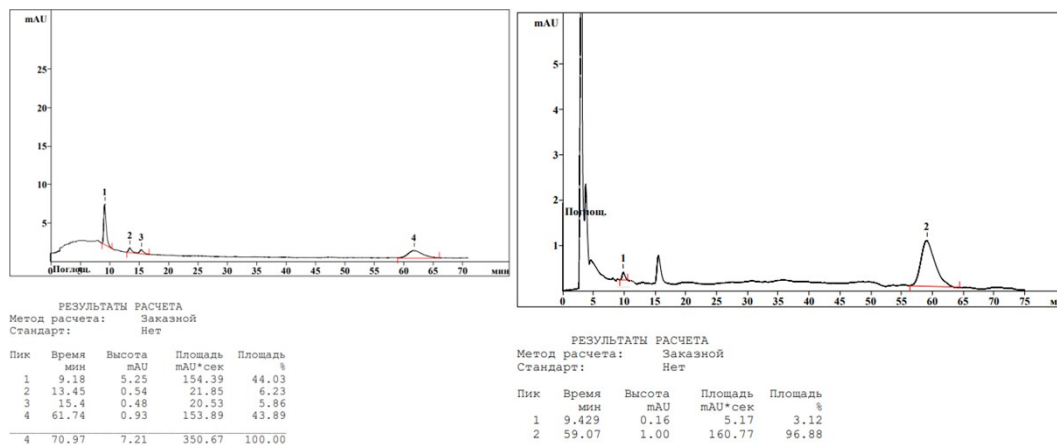



### 3-Nitro-4-(thiophen-2-yl)-3,4-dihydro-2H-benzo[g]chromene-5,10-dione (8dg):

91% ee [HPLC Chiralpak AD-H, *n*-hexane/*i*PrOH 80:20, 1 mL min<sup>-1</sup>, 220 nm,  $t_{\text{major}} = 20.4$  min,  $t_{\text{minor}} = 7.0$  min].

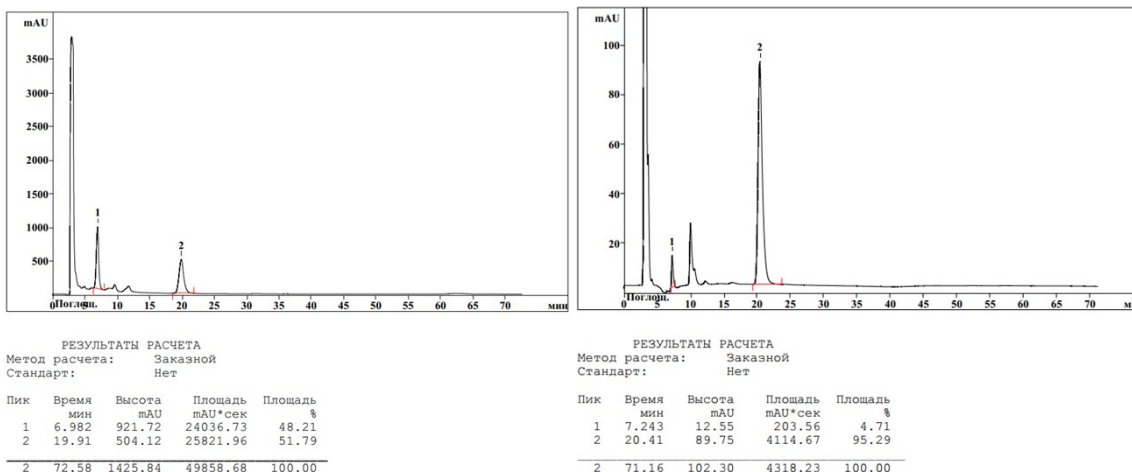

### 3-Nitro-4-styryl-3,4-dihydro-2H-benzo[g]chromene-5,10-dione (8eg):

99% ee [HPLC Chiralpak AD-H, *n*-hexane/*i*PrOH 80:20, 1 mL min<sup>-1</sup>, 220 nm,  $t_{\text{major}} = 38.4$  min,  $t_{\text{minor}} = 12.7$  min].

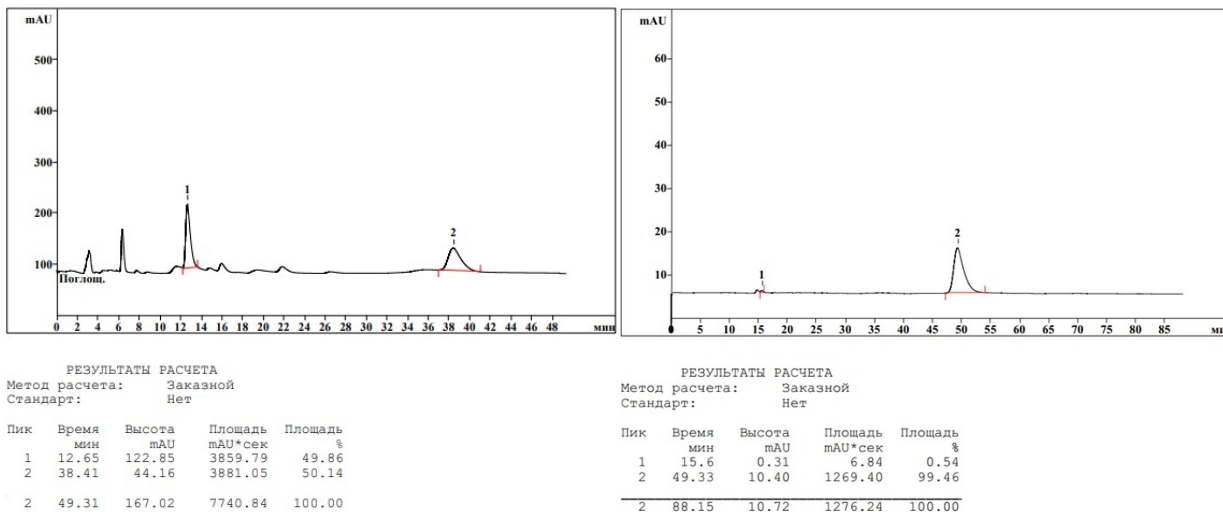

## 6. X-ray crystallographic data and refinement details for product 8ag.

X-ray diffraction data were collected at 100K on a Bruker Quest D8 diffractometer equipped with a Photon-III area-detector (graphite monochromator, shutterless  $\varphi$ - and  $\omega$ -scan technique), using Mo  $K_{\alpha}$ -radiation (0.71073 Å). The intensity data were integrated by the SAINT program<sup>1</sup> and were corrected for absorption and decay using SADABS.<sup>2</sup> The structure was solved by direct methods using SHELXT<sup>3</sup> and refined on  $F^2$  using SHELXL-2018.<sup>4</sup> Positions of all atoms were found from the electron density difference map. Atoms were refined with individual anisotropic (non-H atoms) and isotropic (H-atoms) displacement parameters. Four reflections (0 1 1, 1 3  $\bar{1}$ ,  $\bar{1}$  2  $\bar{1}$ , 1 1 0) were affected by the beam stop, therefore they were omitted from the refinement. Aspherical scattering factors<sup>5</sup> were applied at the final steps of the refinement. The absolute structure parameter was determined by using 2637 quotients  $[(I^+)-(I^-)]/[(I^+)+(I^-)]$ .<sup>6</sup> The SHELXTL program suite<sup>1</sup> was used for molecular graphics.

1. Bruker. APEX-III. *Bruker AXS Inc.*, Madison, Wisconsin, USA, 2018.
2. Krause, L.; Herbst-Irmer, R.; Sheldrick, G. M.; Stalke, D. Comparison of silver and molybdenum microfocus X-ray sources for single-crystal structure determination. *J. Appl. Cryst.* **2015**, 48, 3–10. <https://doi.org/10.1107/S1600576714022985>
3. Sheldrick, G. M. SHELXT - Integrated space-group and crystal-structure determination. *Acta Cryst.* **2015**, A71, 3-8. <https://doi.org/10.1107/S2053273314026370>
4. Sheldrick, G. M. Crystal structure refinement with SHELXL. *Acta Cryst.* **2015**, C71, 3-8. <https://doi.org/10.1107/S2053229614024218>
5. Lübben, J.; Wandtke, C.M.; Hübschle, Ch.B.; Ruf, M.; Sheldrick, G.M.; Dittrich, B. Aspherical scattering factors for SHELXL – model, implementation and application. *Acta Cryst.* 2019, **A75**, 50-62. <https://doi.org/10.1107/S2053273318013840>
6. Parsons, S.; Flack, H.D.; Wagner, T. Use of intensity quotients and differences in absolute structure refinement. *Acta Cryst.* 2013, **B69**, 249-259. <https://doi.org/10.1107/S2052519213010014>

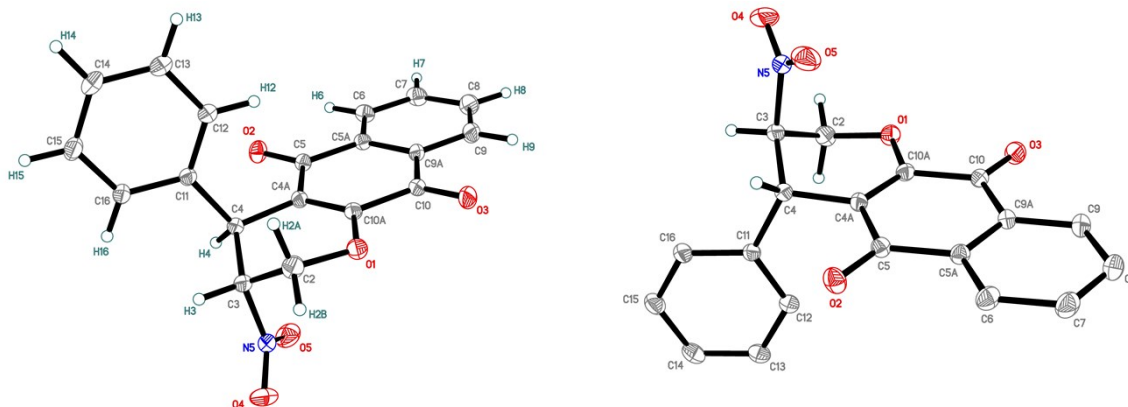

Table 1. Crystal data and structure refinement for KA152-3.

|                                   |                                             |          |
|-----------------------------------|---------------------------------------------|----------|
| Identification code               | KA152-3                                     |          |
| Empirical formula                 | C19 H13 N O5                                |          |
| Formula weight                    | 335.30                                      |          |
| Temperature                       | 100(2) K                                    |          |
| Wavelength                        | 0.71073 Å                                   |          |
| Crystal system                    | Tetragonal                                  |          |
| Space group                       | P4 <sub>3</sub>                             |          |
| Unit cell dimensions              | a = 12.42180(14) Å                          | α = 90°. |
|                                   | b = 12.42180(14) Å                          | β = 90°. |
|                                   | c = 9.8189(2) Å                             | γ = 90°. |
| Volume                            | 1515.07(5) Å <sup>3</sup>                   |          |
| Z                                 | 4                                           |          |
| Density (calculated)              | 1.470 g/cm <sup>3</sup>                     |          |
| Absorption coefficient            | 0.108 mm <sup>-1</sup>                      |          |
| F(000)                            | 696                                         |          |
| Crystal size                      | 0.33 x 0.21 x 0.08 mm <sup>3</sup>          |          |
| Theta range for data collection   | 2.644 to 33.419°.                           |          |
| Index ranges                      | -19 ≤ h ≤ 19, -19 ≤ k ≤ 19, -15 ≤ l ≤ 15    |          |
| Reflections collected             | 59697                                       |          |
| Independent reflections           | 5899 [R(int) = 0.0289]                      |          |
| Observed reflections              | 5688                                        |          |
| Completeness to theta = 25.242°   | 99.6 %                                      |          |
| Absorption correction             | Semi-empirical from equivalents             |          |
| Max. and min. transmission        | 0.8499 and 0.7971                           |          |
| Refinement method                 | Full-matrix least-squares on F <sup>2</sup> |          |
| Data / restraints / parameters    | 5899 / 1 / 281                              |          |
| Goodness-of-fit on F <sup>2</sup> | 1.048                                       |          |
| Final R indices [I > 2σ(I)]       | R1 = 0.0205, wR2 = 0.0526                   |          |
| R indices (all data)              | R1 = 0.0222, wR2 = 0.0541                   |          |
| Absolute structure parameter      | -0.03(13)                                   |          |
| Largest diff. peak and hole       | 0.173 and -0.111 e.Å <sup>-3</sup>          |          |

Table 2. Atomic coordinates ( $\times 10^4$ ) and equivalent isotropic displacement parameters ( $\text{\AA}^2 \times 10^3$ ) for KA152-3.  $U(\text{eq})$  is defined as one third of the trace of the orthogonalized  $U^{ij}$  tensor.

|        | x       | y       | z       | $U(\text{eq})$ |
|--------|---------|---------|---------|----------------|
| O(1)   | 346(1)  | 7133(1) | 3337(1) | 18(1)          |
| O(2)   | 3563(1) | 6570(1) | 5806(1) | 20(1)          |
| O(3)   | -364(1) | 8310(1) | 5372(1) | 23(1)          |
| O(4)   | 245(1)  | 4384(1) | 2272(1) | 41(1)          |
| O(5)   | 945(1)  | 4637(1) | 4271(1) | 30(1)          |
| N(5)   | 865(1)  | 4841(1) | 3059(1) | 24(1)          |
| C(2)   | 807(1)  | 6674(1) | 2128(1) | 20(1)          |
| C(3)   | 1544(1) | 5737(1) | 2453(1) | 18(1)          |
| C(4)   | 2453(1) | 6088(1) | 3399(1) | 14(1)          |
| C(4A)  | 1998(1) | 6788(1) | 4511(1) | 14(1)          |
| C(5)   | 2652(1) | 6949(1) | 5741(1) | 14(1)          |
| C(5A)  | 2182(1) | 7566(1) | 6894(1) | 14(1)          |
| C(6)   | 2766(1) | 7675(1) | 8101(1) | 18(1)          |
| C(7)   | 2324(1) | 8235(1) | 9193(1) | 22(1)          |
| C(8)   | 1310(1) | 8701(1) | 9082(1) | 23(1)          |
| C(9)   | 724(1)  | 8594(1) | 7884(1) | 21(1)          |
| C(9A)  | 1156(1) | 8018(1) | 6790(1) | 15(1)          |
| C(10)  | 517(1)  | 7895(1) | 5527(1) | 16(1)          |
| C(10A) | 1008(1) | 7238(1) | 4414(1) | 14(1)          |
| C(11)  | 3319(1) | 6643(1) | 2551(1) | 14(1)          |
| C(12)  | 3528(1) | 7740(1) | 2668(1) | 16(1)          |
| C(13)  | 4318(1) | 8224(1) | 1866(1) | 18(1)          |
| C(14)  | 4891(1) | 7618(1) | 921(1)  | 21(1)          |
| C(15)  | 4684(1) | 6519(1) | 797(1)  | 21(1)          |
| C(16)  | 3905(1) | 6036(1) | 1614(1) | 18(1)          |

Table 3. Bond lengths [Å] and angles [°] for KA152-3.

---

|              |            |
|--------------|------------|
| O(1)-C(10A)  | 1.3466(10) |
| O(1)-C(2)    | 1.4361(11) |
| O(2)-C(5)    | 1.2272(10) |
| O(3)-C(10)   | 1.2194(10) |
| O(4)-N(5)    | 1.2291(12) |
| O(5)-N(5)    | 1.2210(13) |
| N(5)-C(3)    | 1.5182(12) |
| C(2)-C(3)    | 1.5151(13) |
| C(2)-H(2A)   | 1.051(16)  |
| C(2)-H(2B)   | 0.996(17)  |
| C(3)-C(4)    | 1.5260(12) |
| C(3)-H(3)    | 1.012(16)  |
| C(4)-C(4A)   | 1.5053(11) |
| C(4)-C(11)   | 1.5251(11) |
| C(4)-H(4)    | 1.000(15)  |
| C(4A)-C(10A) | 1.3540(11) |
| C(4A)-C(5)   | 1.4693(11) |
| C(5)-C(5A)   | 1.4869(11) |
| C(5A)-C(6)   | 1.3950(11) |
| C(5A)-C(9A)  | 1.3975(11) |
| C(6)-C(7)    | 1.3908(12) |
| C(6)-H(6)    | 0.993(16)  |
| C(7)-C(8)    | 1.3900(14) |
| C(7)-H(7)    | 1.043(17)  |
| C(8)-C(9)    | 1.3894(14) |
| C(8)-H(8)    | 0.98(2)    |
| C(9)-C(9A)   | 1.3981(12) |
| C(9)-H(9)    | 1.017(15)  |
| C(9A)-C(10)  | 1.4803(12) |
| C(10)-C(10A) | 1.4945(11) |
| C(11)-C(12)  | 1.3919(11) |
| C(11)-C(16)  | 1.3949(11) |
| C(12)-C(13)  | 1.3958(12) |
| C(12)-H(12)  | 0.980(15)  |
| C(13)-C(14)  | 1.3902(13) |
| C(13)-H(13)  | 0.979(15)  |
| C(14)-C(15)  | 1.3947(14) |
| C(14)-H(14)  | 1.017(17)  |

|                   |            |
|-------------------|------------|
| C(15)-C(16)       | 1.3928(12) |
| C(15)-H(15)       | 0.980(17)  |
| C(16)-H(16)       | 0.962(14)  |
| C(10A)-O(1)-C(2)  | 116.35(6)  |
| O(5)-N(5)-O(4)    | 124.64(9)  |
| O(5)-N(5)-C(3)    | 119.26(8)  |
| O(4)-N(5)-C(3)    | 116.08(9)  |
| O(1)-C(2)-C(3)    | 111.81(7)  |
| O(1)-C(2)-H(2A)   | 108.1(9)   |
| C(3)-C(2)-H(2A)   | 107.8(9)   |
| O(1)-C(2)-H(2B)   | 108.2(10)  |
| C(3)-C(2)-H(2B)   | 109.1(10)  |
| H(2A)-C(2)-H(2B)  | 111.9(14)  |
| C(2)-C(3)-N(5)    | 108.07(7)  |
| C(2)-C(3)-C(4)    | 110.84(7)  |
| N(5)-C(3)-C(4)    | 112.49(7)  |
| C(2)-C(3)-H(3)    | 108.5(9)   |
| N(5)-C(3)-H(3)    | 102.9(8)   |
| C(4)-C(3)-H(3)    | 113.6(8)   |
| C(4A)-C(4)-C(11)  | 113.62(6)  |
| C(4A)-C(4)-C(3)   | 109.19(7)  |
| C(11)-C(4)-C(3)   | 108.57(7)  |
| C(4A)-C(4)-H(4)   | 110.2(9)   |
| C(11)-C(4)-H(4)   | 106.9(8)   |
| C(3)-C(4)-H(4)    | 108.2(8)   |
| C(10A)-C(4A)-C(5) | 120.27(7)  |
| C(10A)-C(4A)-C(4) | 121.88(7)  |
| C(5)-C(4A)-C(4)   | 117.83(7)  |
| O(2)-C(5)-C(4A)   | 120.04(7)  |
| O(2)-C(5)-C(5A)   | 121.33(7)  |
| C(4A)-C(5)-C(5A)  | 118.63(7)  |
| C(6)-C(5A)-C(9A)  | 119.82(7)  |
| C(6)-C(5A)-C(5)   | 119.55(7)  |
| C(9A)-C(5A)-C(5)  | 120.61(7)  |
| C(7)-C(6)-C(5A)   | 119.91(8)  |
| C(7)-C(6)-H(6)    | 120.1(10)  |
| C(5A)-C(6)-H(6)   | 120.0(10)  |
| C(8)-C(7)-C(6)    | 120.30(8)  |
| C(8)-C(7)-H(7)    | 120.5(9)   |

|                    |           |
|--------------------|-----------|
| C(6)-C(7)-H(7)     | 119.2(9)  |
| C(9)-C(8)-C(7)     | 120.13(8) |
| C(9)-C(8)-H(8)     | 118.3(11) |
| C(7)-C(8)-H(8)     | 121.6(11) |
| C(8)-C(9)-C(9A)    | 119.87(9) |
| C(8)-C(9)-H(9)     | 121.3(9)  |
| C(9A)-C(9)-H(9)    | 118.8(9)  |
| C(5A)-C(9A)-C(9)   | 119.95(8) |
| C(5A)-C(9A)-C(10)  | 120.64(7) |
| C(9)-C(9A)-C(10)   | 119.40(7) |
| O(3)-C(10)-C(9A)   | 122.83(8) |
| O(3)-C(10)-C(10A)  | 120.44(8) |
| C(9A)-C(10)-C(10A) | 116.73(7) |
| O(1)-C(10A)-C(4A)  | 124.78(7) |
| O(1)-C(10A)-C(10)  | 112.19(7) |
| C(4A)-C(10A)-C(10) | 123.02(7) |
| C(12)-C(11)-C(16)  | 119.12(7) |
| C(12)-C(11)-C(4)   | 121.89(7) |
| C(16)-C(11)-C(4)   | 118.97(7) |
| C(11)-C(12)-C(13)  | 120.41(8) |
| C(11)-C(12)-H(12)  | 119.2(9)  |
| C(13)-C(12)-H(12)  | 120.3(9)  |
| C(14)-C(13)-C(12)  | 120.24(8) |
| C(14)-C(13)-H(13)  | 121.4(9)  |
| C(12)-C(13)-H(13)  | 118.4(9)  |
| C(13)-C(14)-C(15)  | 119.61(8) |
| C(13)-C(14)-H(14)  | 119.7(9)  |
| C(15)-C(14)-H(14)  | 120.6(9)  |
| C(16)-C(15)-C(14)  | 119.96(8) |
| C(16)-C(15)-H(15)  | 120.8(10) |
| C(14)-C(15)-H(15)  | 119.2(10) |
| C(15)-C(16)-C(11)  | 120.65(8) |
| C(15)-C(16)-H(16)  | 118.2(9)  |
| C(11)-C(16)-H(16)  | 121.1(9)  |

---

Table 4. Anisotropic displacement parameters ( $\text{\AA}^2 \times 10^3$ ) for KA152-3. The anisotropic displacement factor exponent takes the form:  $-2\pi^2 [ h^2 a^{*2} U^{11} + \dots + 2 h k a^* b^* U^{12} ]$

---

|        | U <sup>11</sup> | U <sup>22</sup> | U <sup>33</sup> | U <sup>23</sup> | U <sup>13</sup> | U <sup>12</sup> |
|--------|-----------------|-----------------|-----------------|-----------------|-----------------|-----------------|
| O(1)   | 16(1)           | 21(1)           | 17(1)           | -3(1)           | -4(1)           | 1(1)            |
| O(2)   | 15(1)           | 26(1)           | 19(1)           | 0(1)            | -2(1)           | 5(1)            |
| O(3)   | 14(1)           | 24(1)           | 32(1)           | -9(1)           | -2(1)           | 4(1)            |
| O(4)   | 31(1)           | 43(1)           | 50(1)           | -22(1)          | 9(1)            | -21(1)          |
| O(5)   | 26(1)           | 24(1)           | 42(1)           | 7(1)            | 6(1)            | -3(1)           |
| N(5)   | 17(1)           | 19(1)           | 35(1)           | -9(1)           | 8(1)            | -4(1)           |
| C(2)   | 18(1)           | 28(1)           | 15(1)           | -4(1)           | -2(1)           | -1(1)           |
| C(3)   | 15(1)           | 20(1)           | 19(1)           | -6(1)           | 3(1)            | -5(1)           |
| C(4)   | 14(1)           | 15(1)           | 15(1)           | -2(1)           | 1(1)            | -1(1)           |
| C(4A)  | 13(1)           | 14(1)           | 13(1)           | -1(1)           | 0(1)            | 0(1)            |
| C(5)   | 14(1)           | 16(1)           | 13(1)           | 0(1)            | 0(1)            | 0(1)            |
| C(5A)  | 16(1)           | 15(1)           | 12(1)           | -1(1)           | 0(1)            | -1(1)           |
| C(6)   | 22(1)           | 19(1)           | 14(1)           | -1(1)           | -2(1)           | -2(1)           |
| C(7)   | 27(1)           | 23(1)           | 14(1)           | -3(1)           | -1(1)           | -4(1)           |
| C(8)   | 26(1)           | 28(1)           | 17(1)           | -7(1)           | 4(1)            | -3(1)           |
| C(9)   | 19(1)           | 25(1)           | 20(1)           | -7(1)           | 4(1)            | -1(1)           |
| C(9A)  | 14(1)           | 16(1)           | 16(1)           | -3(1)           | 2(1)            | -1(1)           |
| C(10)  | 13(1)           | 15(1)           | 18(1)           | -4(1)           | 0(1)            | 0(1)            |
| C(10A) | 13(1)           | 15(1)           | 15(1)           | -2(1)           | -1(1)           | -1(1)           |
| C(11)  | 13(1)           | 16(1)           | 14(1)           | -2(1)           | 0(1)            | -1(1)           |
| C(12)  | 15(1)           | 16(1)           | 16(1)           | 1(1)            | 0(1)            | -1(1)           |
| C(13)  | 16(1)           | 19(1)           | 20(1)           | 4(1)            | -1(1)           | -2(1)           |
| C(14)  | 16(1)           | 27(1)           | 19(1)           | 4(1)            | 2(1)            | -2(1)           |
| C(15)  | 17(1)           | 27(1)           | 20(1)           | -2(1)           | 5(1)            | -2(1)           |
| C(16)  | 16(1)           | 21(1)           | 18(1)           | -4(1)           | 3(1)            | -2(1)           |



Table 5. Hydrogen coordinates ( $\times 10^4$ ) and isotropic displacement parameters ( $\text{\AA}^2 \times 10^{-3}$ ) for KA152-3.

|       | x        | y        | z         | U(eq) |
|-------|----------|----------|-----------|-------|
| H(2A) | 1270(13) | 7271(13) | 1646(18)  | 32(4) |
| H(2B) | 209(13)  | 6416(13) | 1536(19)  | 38(4) |
| H(3)  | 1805(12) | 5414(12) | 1566(17)  | 26(3) |
| H(4)  | 2789(12) | 5429(12) | 3799(16)  | 26(4) |
| H(6)  | 3488(13) | 7340(12) | 8186(18)  | 33(4) |
| H(7)  | 2764(13) | 8303(13) | 10094(18) | 32(4) |
| H(8)  | 985(14)  | 9099(14) | 9840(20)  | 44(4) |
| H(9)  | -12(12)  | 8941(12) | 7775(16)  | 29(4) |
| H(12) | 3131(12) | 8164(12) | 3345(16)  | 27(3) |
| H(13) | 4451(12) | 8996(12) | 1980(16)  | 30(4) |
| H(14) | 5472(13) | 7976(12) | 349(18)   | 34(4) |
| H(15) | 5115(13) | 6090(13) | 161(18)   | 35(4) |
| H(16) | 3787(11) | 5274(11) | 1518(15)  | 21(3) |

Table 6. Torsion angles [°] for KA152-3.

---

|                          |            |
|--------------------------|------------|
| C(10A)-O(1)-C(2)-C(3)    | 41.23(10)  |
| O(1)-C(2)-C(3)-N(5)      | 65.21(9)   |
| O(1)-C(2)-C(3)-C(4)      | -58.48(9)  |
| O(5)-N(5)-C(3)-C(2)      | -108.50(9) |
| O(4)-N(5)-C(3)-C(2)      | 69.93(10)  |
| O(5)-N(5)-C(3)-C(4)      | 14.19(11)  |
| O(4)-N(5)-C(3)-C(4)      | -167.38(8) |
| C(2)-C(3)-C(4)-C(4A)     | 44.08(9)   |
| N(5)-C(3)-C(4)-C(4A)     | -77.03(8)  |
| C(2)-C(3)-C(4)-C(11)     | -80.27(8)  |
| N(5)-C(3)-C(4)-C(11)     | 158.61(7)  |
| C(11)-C(4)-C(4A)-C(10A)  | 105.17(9)  |
| C(3)-C(4)-C(4A)-C(10A)   | -16.17(10) |
| C(11)-C(4)-C(4A)-C(5)    | -76.43(9)  |
| C(3)-C(4)-C(4A)-C(5)     | 162.23(7)  |
| C(10A)-C(4A)-C(5)-O(2)   | -177.55(8) |
| C(4)-C(4A)-C(5)-O(2)     | 4.03(11)   |
| C(10A)-C(4A)-C(5)-C(5A)  | 3.12(11)   |
| C(4)-C(4A)-C(5)-C(5A)    | -175.30(7) |
| O(2)-C(5)-C(5A)-C(6)     | -3.01(12)  |
| C(4A)-C(5)-C(5A)-C(6)    | 176.30(7)  |
| O(2)-C(5)-C(5A)-C(9A)    | 178.22(8)  |
| C(4A)-C(5)-C(5A)-C(9A)   | -2.46(11)  |
| C(9A)-C(5A)-C(6)-C(7)    | -0.09(12)  |
| C(5)-C(5A)-C(6)-C(7)     | -178.86(8) |
| C(5A)-C(6)-C(7)-C(8)     | -1.05(14)  |
| C(6)-C(7)-C(8)-C(9)      | 1.16(15)   |
| C(7)-C(8)-C(9)-C(9A)     | -0.13(15)  |
| C(6)-C(5A)-C(9A)-C(9)    | 1.11(12)   |
| C(5)-C(5A)-C(9A)-C(9)    | 179.87(8)  |
| C(6)-C(5A)-C(9A)-C(10)   | -179.00(8) |
| C(5)-C(5A)-C(9A)-C(10)   | -0.24(12)  |
| C(8)-C(9)-C(9A)-C(5A)    | -1.00(13)  |
| C(8)-C(9)-C(9A)-C(10)    | 179.11(8)  |
| C(5A)-C(9A)-C(10)-O(3)   | -177.11(8) |
| C(9)-C(9A)-C(10)-O(3)    | 2.78(13)   |
| C(5A)-C(9A)-C(10)-C(10A) | 2.24(11)   |
| C(9)-C(9A)-C(10)-C(10A)  | -177.87(8) |

|                          |            |
|--------------------------|------------|
| C(2)-O(1)-C(10A)-C(4A)   | -11.56(12) |
| C(2)-O(1)-C(10A)-C(10)   | 169.76(7)  |
| C(5)-C(4A)-C(10A)-O(1)   | -179.63(7) |
| C(4)-C(4A)-C(10A)-O(1)   | -1.27(12)  |
| C(5)-C(4A)-C(10A)-C(10)  | -1.09(12)  |
| C(4)-C(4A)-C(10A)-C(10)  | 177.27(7)  |
| O(3)-C(10)-C(10A)-O(1)   | -3.53(11)  |
| C(9A)-C(10)-C(10A)-O(1)  | 177.10(7)  |
| O(3)-C(10)-C(10A)-C(4A)  | 177.77(8)  |
| C(9A)-C(10)-C(10A)-C(4A) | -1.60(11)  |
| C(4A)-C(4)-C(11)-C(12)   | -9.77(11)  |
| C(3)-C(4)-C(11)-C(12)    | 111.92(8)  |
| C(4A)-C(4)-C(11)-C(16)   | 171.32(7)  |
| C(3)-C(4)-C(11)-C(16)    | -66.99(10) |
| C(16)-C(11)-C(12)-C(13)  | -0.42(12)  |
| C(4)-C(11)-C(12)-C(13)   | -179.33(8) |
| C(11)-C(12)-C(13)-C(14)  | 1.21(13)   |
| C(12)-C(13)-C(14)-C(15)  | -1.09(13)  |
| C(13)-C(14)-C(15)-C(16)  | 0.19(14)   |
| C(14)-C(15)-C(16)-C(11)  | 0.61(14)   |
| C(12)-C(11)-C(16)-C(15)  | -0.49(13)  |
| C(4)-C(11)-C(16)-C(15)   | 178.45(8)  |

---
